# Supplementary material for: Quality of descriptions of treatments: a review of published randomised controlled trials
Source: PubMed Central journal article supplement — BMJ Open. 2012 Nov 22;2(6):e001978. doi: 10.1136/bmjopen-2012-001978 (PMC3533061; doi:10.1136/bmjopen-2012-001978), 2012-11-22
Supplement: bmjopen-2012-001978.draft_revisions.pdf [file bmjopen-2012-001978.draft_revisions.pdf]

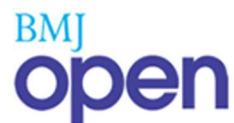

**Quality of descriptions of treatments: A review of published randomised controlled trials**

|                                 |                                                                                                                                                              |
|---------------------------------|--------------------------------------------------------------------------------------------------------------------------------------------------------------|
| Journal:                        | <i>BMJ Open</i>                                                                                                                                              |
| Manuscript ID:                  | bmjopen-2012-001978                                                                                                                                          |
| Article Type:                   | Research                                                                                                                                                     |
| Date Submitted by the Author:   | 21-Aug-2012                                                                                                                                                  |
| Complete List of Authors:       | Schroter, Sara; BMJ Editorial, GLasziou, Paul; Oxford University, Department of Primary Care, Heneghan, Carl; Oxford University, Department of Primary Care, |
| <b>Primary Subject Heading</b>: | Medical publishing and peer review                                                                                                                           |
| Secondary Subject Heading:      | Communication, Evidence based practice                                                                                                                       |
| Keywords:                       | GENERAL MEDICINE (see Internal Medicine), Protocols & guidelines < HEALTH SERVICES ADMINISTRATION & MANAGEMENT, JOURNALISM (see Medical Journalism)          |
|                                 |                                                                                                                                                              |

SCHOLARONE™  
Manuscripts

Peer Review Only

1  
2  
3 **Quality of descriptions of treatments:**

4  
5 **A review of published randomised controlled trials**

6  
7  
8  
9  
10 Sara Schroter (PhD),<sup>1,2</sup> Paul Glasziou (PhD),<sup>2</sup> Carl Heneghan (MRCGP)<sup>2</sup>

- 11  
12  
13  
14  
15  
16  
17  
18 1. BMJ Editorial, BMA House, Tavistock Square, London WC1H 9JR, UK  
19  
20  
21  
22 2. Centre for Evidence Based Medicine, Department of Primary Care,  
23  
24 Oxford University, Old Road Campus, Headington, Oxford, OX3 7LF,  
25  
26  
27 UK  
28  
29  
30  
31  
32  
33  
34

35 **Corresponding author:**

36 Dr Sara Schroter  
37 Senior Researcher  
38 BMJ Editorial  
39 BMA House  
40 Tavistock Square  
41 London WC1H 9JR

42  
43  
44 Tel: +44 20 7383 6744  
45 Fax: +44 20 7383 6418  
46 Email: [sschroter@bmj.com](mailto:sschroter@bmj.com)  
47  
48  
49  
50

51  
52 Word count: 2,341 words  
53  
54  
55  
56  
57  
58  
59  
60

## ABSTRACT

**Objectives:** To be useable in clinical practice, treatments studied in trials must provide sufficient information to enable clinicians and researchers to replicate. We sought to assess the completeness of treatment descriptions in published randomised controlled trials using a checklist and to determine the extent to which peer reviewers and editors comment on the quality of reporting of treatments.

**Design:** Cross-sectional study.

**Setting:** Trials published in the BMJ, a general medical journal.

**Participants:** 51 trials published in the BMJ were independently evaluated by two raters using the checklist. Reviewers' and editors' comments were also assessed for statements on treatment descriptions.

**Primary and secondary outcome measures:** Proportion of trials rated as replicable (primary outcome).

**Results:** For 57% of the papers, published treatment descriptions were not considered sufficient to allow replication. Most poorly described aspects were the actual procedures involved including the sequencing of the technique (what happened and when) and the physical or informational materials used (e.g. training materials): 53% and 43% not clear, respectively. For a third of treatments, the dose/duration of individual sessions was not clear and for a quarter the schedule (interval, frequency, duration, or timing) was not clear. Although the majority of problems were not picked up by reviewers and editors, when they were detected only about two-thirds were fixed before publication.

1  
2  
3 **Conclusions:** Journals wanting to publish research of use to practicing  
4 health care professionals need to pay more attention to descriptions  
5 of treatments. Our checklist, may be useful for reviewers, and  
6 editors and could help ensure important details of treatments are  
7 provided before papers are in the public domain.  
8  
9  
10  
11  
12  
13  
14  
15  
16  
17  
18  
19  
20  
21  
22  
23  
24  
25  
26  
27  
28  
29  
30  
31  
32  
33  
34  
35  
36  
37  
38  
39  
40  
41  
42  
43  
44  
45  
46  
47  
48  
49  
50  
51  
52  
53  
54  
55  
56  
57  
58  
59  
60

For peer review only

## ARTICLE SUMMARY

### *Article focus*

- For clinicians applying treatments, or researchers wishing to replicate or extend research findings, adequate treatment descriptions in publications are vital.
- We document the adequacy of reporting of different elements of descriptions of treatments in RCTs published in the BMJ; we determine the extent to which peer reviewers and editors comment on the adequacy of reporting of treatments, and correct these during the review process; and develop a simple checklist for use by editors and reviewers to enhance the reporting quality of published interventions.

### *Key messages*

- The majority of published trials in our study lacked important details describing the treatment. These details would be required for health care professionals to undertake these treatments in practice, and for other researchers to replicate, or build on, the findings in future studies.
- Although the majority of problems were not picked up by peer reviewers and editors, when they were detected only about two-thirds were fixed before publication.
- The incomplete treatment descriptions we found represent a substantial waste of the research budget, trial participants' time, and an opportunity cost for clinicians and patients.

### *Strengths and limitations of this study*

- This study systematically assesses the quality of descriptions of interventions in a general medical journal and reports on whether reviewers and editors detect and fix problems with the descriptions of treatments in trials.

- We included only RCTs in one general medical journal and the results may not be generalisable to other journals. However, the BMJ has a lengthy review process and is generally considered to publish high quality research so it is likely that the situation is worse for less influential lower impact factor journals with fewer resources.
- We used two raters who were both academic general practitioners to assess the manuscripts. However, none of the papers in this study described treatments that our raters found too specialised to evaluate so none were excluded.

## INTRODUCTION

Before dissemination, innovations in treatment require two things: (i) valid research that demonstrates the treatment's effectiveness and (ii) a description of the treatment procedure sufficient to allow clinicians and others to apply the treatment in practice. Both elements require adequate reporting. The Consolidated Standards for Reporting Trials (CONSORT) statement on reporting randomised controlled trials (RCTs) [1] was developed to help authors and editors improve the reporting of RCTs and has been widely accepted. It has been influential in improving the quality of reporting trials' methods and results.[2] However, less attention has been given to the second element: the description of the treatment being tested. For clinicians applying treatments, or researchers who wish to replicate or extend the findings, adequate treatment descriptions are vital. Treatments vary considerably in their complexity. At one end of the extreme are simple drug trials with fixed dose drugs requiring only specification of the chemical entity, dose, frequency and duration of treatment. However, even drug treatments can require more detail if treatment requires titration, monitoring, complex delivery systems, or co-treatments. Non-drug treatments require these same elements, but a physical, educational, or psychological procedure - equivalent, of the chemical entity - is often far more complex. At the other extreme are multi-stage surgical procedures that may not be codifiable and require training in the institution that developed the procedure. Between these extremes are educational treatments, physical treatments such as physiotherapy, and psychological treatments.

Two of CONSORT's 22 items are directly relevant to clinicians wishing to apply treatments: the eligibility criteria for participants and the settings and locations where the data were collected (item 3), and precise details of the treatments intended for each group and how and when they were actually administered (item 4). Yet previous work has

1  
2  
3 suggested this may be insufficient to guide an adequate treatment  
4 description.[3-5] Table 1 shows previous studies findings on  
5 inadequate reporting of specific aspects of trial interventions within  
6 a range of treatment areas; for example, an evaluation of trials  
7 complying with item 4 of the CONSORT statement.[3-10]. Some attempts  
8 have been made to develop detailed specifications in some treatment  
9 areas. For example, Davidson et al [11] have outlined the minimal  
10 treatment detail to be described in research reports in behavioural  
11 medicine. In a similar vein, specific reporting checklists are being  
12 developed for some types of treatments such as herbal treatments[12]  
13 and homeopathy [13], which often require additional treatment details.  
14 None of these studies have systematically assessed the quality of  
15 descriptions of a series of interventions in a general medical journal  
16 using a checklist.  
17  
18  
19  
20  
21  
22  
23  
24  
25  
26  
27  
28

29 The purpose of our study was (i) to document the adequacy of reporting  
30 of the different elements of descriptions of treatments in RCTs  
31 published over one year in a general medical journal (the BMJ); (ii)  
32 to determine the extent to which peer reviewers and editors comment on  
33 the adequacy of reporting of treatments, and correct these during the  
34 review process; and (iii) to develop a simple checklist for use by  
35 editors and reviewers to enhance the reporting quality of published  
36 interventions.  
37  
38  
39  
40  
41  
42  
43  
44  
45  
46  
47  
48  
49  
50  
51  
52  
53  
54  
55  
56  
57  
58  
59  
60



## METHODS

### **Development, refining and piloting of the checklist**

Based on the work of Davidson et al[11], the CONSORT statement[1] and our own analysis of poorly reported trials abstracted in the journal Evidence Based Medicine[10], we designed an initial checklist of the minimal details that should be included in a description of a treatment in an RCT. We piloted this on the first 10 papers and then, based on problems identified, revised the checklist. The first 10 papers were then reevaluated with the revised checklist. The revised checklist (Box 1) included the following seven aspects: a description of where the treatment was delivered (setting); who delivered the treatment (provider); who received the treatment (recipient); details of the procedure including the sequencing of the technique (procedure); a description of the physical or informational materials used (materials); the dose/duration of individual sessions of the treatment (intensity); and the scheduling i.e. the interval, frequency, duration, or timing of the treatment (schedule). Raters also completed an additional global item to indicate whether the treatment was sufficiently described for them to replicate it if there were no resource or training constraints (no constraints).

### **Evaluation of published descriptions**

We reviewed the given study design of all research papers published in the BMJ in 2006 and selected all RCTs for possible inclusion. Papers presenting only follow-up data or longer term outcomes of a previously published trial were subsequently excluded as details of the intervention may previously have been reported. The full length version of the published papers was then independently evaluated by two raters (PG and CH) for the clarity of reporting of key features of the intervention using our checklist. Our use of the term intervention refers to "the process of intervening on people, groups,

1  
2 entities or objects in an experimental study"[14]. We did not  
3 evaluate the clarity of reporting of the treatment received by the  
4 control group. Both raters were blind to comments from editors and  
5 reviewers. Raters then discussed the results in person and  
6 disagreements were resolved through consensus discussion supervised by  
7 SS.  
8  
9  
10  
11  
12

### 13 14 15 **Evaluation of the review process**

16 All back history (reviewers' comments and editors' notes) for the  
17 papers were obtained by SS from the BMJ's electronic manuscript  
18 tracking system. SS collated all statements given on the clarity of  
19 the reporting of the treatment for each manuscript and anonymised the  
20 comments. SS then categorised the deficiencies using our checklist.  
21 PG then assessed whether the specified deficiencies had been addressed  
22 in the final published version.  
23  
24  
25  
26  
27  
28  
29  
30  
31  
32  
33  
34  
35  
36  
37  
38  
39  
40  
41  
42  
43  
44  
45  
46  
47  
48  
49  
50  
51  
52  
53  
54  
55  
56  
57  
58  
59  
60

## RESULTS

We included 51 RCTs published in the BMJ in 2006. These papers described studies with a wide range of settings and treatments. 21 (41%) involved the administration of a drug either alone or in addition to another therapy.

### **Replicability**

Overall, assuming no resource or training constraints, both raters reported that 57% (29/51) of the treatments could not be replicated based on the description of the treatment as published. Studies of drug treatments were better described than non-drug treatments: 7/21 (33%) of drug treatments were considered non-replicable in comparison with 22/30 (73%) non-drug treatments.

### **Type of problems identified in published versions**

We identified 99 problems with the descriptions of the interventions in the published versions. For each checklist item the proportion of adequately described features ranged from 47% to 94% (Figure 1). The most poorly described aspects of the treatment were the actual procedures involved including the sequencing of the technique - what happened and when (53% not clear), and the physical or informational materials used e.g. training materials (43% not clear). Aspects of the treatment better described included a description of where the treatment was delivered (94% clear). For a third of the treatments described, the dose, duration, or both of individual sessions of the treatment were not clear and for around a quarter the schedule (interval, frequency, duration, or timing) of the treatment was not clear.

### **Problems identified prior to publication**

During the pre-publication phase of the manuscripts, the reviewers, editors and editorial advisors reported 43 problems with the

1  
2  
3 descriptions of the interventions. Most comments focused on the need  
4 for clarification of the sequencing of the technique described  
5 (procedure) and the patient group under study (recipient). Thirty  
6 three percent (14/43) of these problems were not fully fixed by the  
7 time the paper was published (as assessed by our raters) (Figure 2).  
8 Where reviewers and editors identified problems with descriptions of  
9 the setting, the provider, the materials, and the schedule, these were  
10 improved by the time of publication. Problems that were not corrected  
11 largely concerned the descriptions of the procedures of the treatments  
12 i.e. it was not clear what happened and when. Table 2 shows the 14  
13 problems identified at pre-publication which were not sufficiently  
14 remedied in the published version.  
15  
16  
17  
18  
19  
20  
21  
22  
23  
24  
25  
26  
27  
28  
29  
30  
31  
32  
33  
34  
35  
36  
37  
38  
39  
40  
41  
42  
43  
44  
45  
46  
47  
48  
49  
50  
51  
52  
53  
54  
55  
56  
57  
58  
59  
60

## DISCUSSION

The majority of published trials in our study lacked important details describing the treatment. These details would be required for health care professionals to undertake these treatments in practice, or for other researchers to replicate, or build on, the findings in future studies. Many problems were easily rectifiable, such as clearer reporting on the sequencing of techniques, actual doses/durations of treatments and their scheduling. Although the majority of problems were not picked up by peer reviewers and editors, when they were detected only about two-thirds were fixed before publication.

Our findings are consistent with our earlier analysis of 80 RCTs and systematic reviews published in the journal *Evidence Based Medicine* where approximately a half (51%) had an "inadequate" description of the treatment[10]. *Evidence Based Medicine* abstracts journals in a range of specialties and the similarity in results suggests that the results in this study are valid. Unlike, this study, our previous study did not quantitatively document the types of problems with the treatments described but focused on a global assessment of the replicability of the treatment and whether authors could provide the missing details when asked to do so. The current study went further than our earlier study in that it reports the frequency of poor reporting of specific aspects of trial interventions.[10]

Our study has several limitations. Firstly, we included only RCTs from a single year in one general medical journal and the results may not be generalisable to other journals. However, the BMJ has a lengthy review process and is generally considered to publish high quality research so it is likely that the situation is worse for less influential lower impact factor journals with fewer resources. The BMJ strives to publish papers to "help doctors make better decisions" and is very aware of the importance of good scientific reporting of

1  
2  
3 research. As such it may pay more attention to reporting issues than  
4 other journals. We found that the BMJ reported these aspects of  
5 interventions poorly and this suggests that the situation may well be  
6 worse for other journals. Secondly, we evaluated RCTs published in  
7 2006 and it is possible that there have been improvements in  
8 reporting, given the wider use of the internet and web appendices in  
9 recent years. Further research would be needed to test this.  
10  
11 Thirdly, we used only two raters who were both academic general  
12 practitioners to assess the manuscripts some of which could have  
13 described treatments they were not familiar with. However, all RCTs  
14 published in the BMJ describe treatments that should be familiar to  
15 general practitioners, as it targets a general medical readership.  
16  
17 None of the papers in this study described treatments that our raters  
18 found too specialised to evaluate so none were excluded. Our raters  
19 were also experienced academics interested in improving the reporting  
20 quality of trials and as such the results may represent the best case  
21 scenario. Finally, we did not try to separately assess planned versus  
22 actual treatment, which may sometimes differ substantially and require  
23 specific description[21].  
24  
25  
26  
27  
28  
29  
30  
31  
32  
33  
34  
35  
36

37  
38 We identified a few other previous studies which have examined the  
39 adequacy of treatment descriptions (Table 1). Most of the studies  
40 listed in Table 1 are likely to have reported overestimates of  
41 replicability as only one asked whether there was sufficient  
42 information to allow replication[10]. In developing summaries for  
43 systematic reviews of back pain, Glenton and colleagues[6] found  
44 sufficient detail "about what the treatment involved" for patients in  
45 only 3 of 24 (13%) treatments, and used 32 other sources to obtain  
46 details for the other 21 treatments. Similarly a review[7] of 29  
47 guideline implementation studies found that the majority lacked  
48 details of how the intervention was carried out, e.g., only 7 (24%)  
49 supplied details of timing. Three other studies simply checked the  
50  
51  
52  
53  
54  
55  
56  
57  
58  
59  
60

1  
2  
3 fourth CONSORT item[3-5]. Similar problems have been identified in  
4 other areas. In a recent survey[15] of 93 publications with novel  
5 questionnaires in JAMA, NEJM, and BMJ, four printed the questionnaire  
6 in the article, three provided online access, but authors failed to  
7 provide questionnaires for 37 of 81 (46%) studies. For some clinical  
8 domains, improving the descriptions of treatments may require  
9 additional work to standardise and document the procedures prior to  
10 clinical trials[16].  
11  
12  
13  
14  
15  
16

17  
18 Similar to many journals, BMJ authors are requested to complete the  
19 CONSORT statement when submitting a paper describing an RCT, but are  
20 not specifically asked to describe their interventions in detail. BMJ  
21 reviewers are not routinely instructed to comment on the replicability  
22 of treatments described in papers, but are instructed to check the  
23 CONSORT statement provided by the author. However, item 4 in the  
24 CONSORT statement appears insufficient to guide authors and reviewers  
25 in all the elements needed. Medical journals often send papers to  
26 reviewers who are practicing clinicians in the area of interest and  
27 some may choose to comment on the reporting details of the treatment.  
28 However, the limitations of peer review are well documented[17-20].  
29 In our study, peer reviewers infrequently commented on inadequate  
30 reporting of trial details. Insufficient instructions and guidance to  
31 reviewers and lack of training may compound the problem. However,  
32 even when some limitations were identified by reviewers at the pre-  
33 publication stage they were not always remedied in the published  
34 version.  
35  
36  
37  
38  
39  
40  
41  
42  
43  
44  
45  
46  
47  
48  
49

50 The incomplete treatment descriptions we found represent a substantial  
51 waste of the research budget, trial participants' time, and an  
52 opportunity cost for clinicians and patients. Though not surprising,  
53 the lower rates of adequate description of non-drug alternatives is  
54 unfortunate given the rapid growth of the pharmaceuticals budget, and  
55  
56  
57  
58  
59  
60

1  
2 the potential for non-drug therapies for alternative treatments.  
3 Funders, authors, journals, and research users should all be concerned  
4 with this problem and work together to improve the situation.  
5  
6 Journals that want to publish high quality research of use to  
7 practicing health care professionals need to pay attention to adequate  
8 descriptions of treatments. One element of any solution should be a  
9 simple checklist, such as the generic one we have developed, or  
10 specific checklists such as the CONSORT interventions extensions  
11 (<http://www.consort-statement.org/extensions/>). Such checklists may  
12 be useful for authors, peer reviewers, and editors to help ensure that  
13 important details of treatments are provided before the paper is  
14 published and in the public domain. However, the effectiveness of  
15 such checklists needs to be further evaluated. Finally, since  
16 describing study materials could add significantly to the length of  
17 papers we suggest that editors encourage the use of webextras and/or  
18 links to study materials on authors' institutional websites.  
19  
20  
21  
22  
23  
24  
25  
26  
27  
28  
29  
30  
31  
32  
33  
34  
35  
36  
37  
38  
39  
40  
41  
42  
43  
44  
45  
46  
47  
48  
49  
50  
51  
52  
53  
54  
55  
56  
57  
58  
59  
60



## Acknowledgements

We thank the BMJ Group for SS's time on this project.

## Contributorship

SS had full access to all the data in the study and takes responsibility for the integrity of the data and the accuracy of the data analysis. No other staff at the BMJ were involved in the design and conduct of the study; collection, management, analysis, and interpretation of the data; and preparation, review, or approval of the manuscript. SS, PG and CH designed the study; PG and CH rated the manuscripts for replicability; SS analysed the manuscripts' backmatter; SS analysed the data; SS, PG and CH wrote the manuscript.

## Funding

This research received no specific grant from any funding agency in the public, commercial or not-for-profit sectors.

The University Department of Primary Health Care is part of the NIHR School of Primary Care Research which provides financial support for senior staff who contributed to this paper. The opinions are those of the authors and not of the Department of Health.

## Competing interests

SS is employed full time by BMJ Group.

## Ethics

We did not seek ethics committee approval for this study as it mainly involved the evaluation of published manuscripts in the public domain. Only SS had access to named reviewers' and editors' comments but is a full time employee of the BMJ Publishing Group and regularly reads such material as part of her job. On submitting to the BMJ, prospective authors are informed that their paper may be enrolled in a

1  
2  
3 research study as part of improving the peer review process and are  
4 given the opportunity to opt out of this.  
5  
6  
7

### 8 **Data sharing**

9  
10 The checklist responses for each trial alongside an indication of  
11 whether a problem with the description of the intervention was  
12 reported prior to publication are available as a dataset on Dryad:  
13 doi:10.5061/dryad.c1jv0.  
14  
15  
16  
17  
18  
19  
20  
21  
22  
23  
24  
25  
26  
27  
28  
29  
30  
31  
32  
33  
34  
35  
36  
37  
38  
39  
40  
41  
42  
43  
44  
45  
46  
47  
48  
49  
50  
51  
52  
53  
54  
55  
56  
57  
58  
59  
60

## REFERENCES

1. Moher D, Schulz KF, Altman DG, et al. The CONSORT Statement: Revised Recommendations for Improving the Quality of Reports of Parallel-Group Randomized Trials. *Ann Intern Med* 2001;134:657-62.
2. Plint AC, Moher D, Morrison A, et al. Does the CONSORT checklist improve the quality of reports of randomised controlled trials? A systematic review. *Med J Aust* 2006;185(5):263-7.
3. Thabane L, Chu R, Cuddy K, et al. What is the quality of reporting in weight loss intervention studies? A systematic review of randomized controlled trials. *Int J Obes (Lond)* 2007;31(10):1554-9.
4. Kober T, Trelle S, Engert A. Reporting of randomized controlled trials in Hodgkin lymphoma in biomedical journals. *J Natl Cancer Inst* 2006;98(9):620-5.
5. Lai R, Chu R, Fraumeni M, et al. Quality of randomized controlled trials reporting in the primary treatment of brain tumors. *J Clin Oncol* 2006;24(7):1136-44.
6. Glenton C, Underland V, Kho M, et al. Summaries of findings, descriptions of treatments, and information about adverse effects would make reviews more informative. *J Clin Epidemiol* 2006;59(8):770-8. Epub 2006 May 30.
7. Thorsen T & Makela M (eds). Changing Professional Practice Theory and Practice of Clinical Guidelines Implementation. Danish Institute for Health Services Research and Development, 1999. <http://www.dsi.dk>
8. Lasserson DS, Glasziou PP, Perera R, et al. Initiating insulin regimens to achieve intensive glycaemic control for people with type 2 diabetes mellitus. Society for Academic Primary Care Conference, 2006.
9. Jacquier I, Boutron I, Moher D, et al. The Reporting of Randomized Clinical Trials Using a Surgical Intervention Is in Need of

- 1  
2  
3 Immediate Improvement A Systematic Review. *Ann Surg* 2006;244: 677-  
4 83.  
5  
6  
7 10. Glasziou P, Meats E, Heneghan C, et al. What is missing from  
8 descriptions of treatment in trials and reviews? *BMJ* 2008;336:1472-  
9 4.  
10  
11  
12 11. Davidson KW, Goldstein M, Kaplan RM, et al. Evidence-based  
13 behavioral medicine: what is it and how do we achieve it? *Ann*  
14 *Behav Med* 2003;26(3):161-71.  
15  
16  
17 12. Gagnier JJ, Boon H, Rochon P, et al. Reporting Randomized,  
18 Controlled Trials of Herbal Interventions: An Elaborated CONSORT  
19 Statement. *Ann Intern Med* 2006;144:364-7.  
20  
21  
22 13. Dean ME, Morag K, Coulter MK, et al. Reporting Data on Homeopathic  
23 Treatments (RedHot): A Supplement to CONSORT. *Forsch*  
24 *Komplementarmed* 2006;13:368-71.  
25  
26  
27 14. <http://www.cochrane.org/sites/default/files/uploads/glossary.pdf>.  
28 [Accessed 30 July 2012].  
29  
30  
31 15. Schilling LM, Kozak K, Lundahl K, et al. Inaccessible novel  
32 questionnaires in published medical research: hidden methods,  
33 hidden costs. *Am J Epidemiol* 2006;164(12):1141-4. Epub 2006 Oct 13.  
34  
35  
36 16. Pomeroy VM, Cooke E, Hamilton S, et al. Development of a schedule  
37 of current physiotherapy treatment used to improve movement control  
38 and functional use of the lower limb after stroke: a precursor to a  
39 clinical trial. *Neurorehabil Neural Repair* 2005;19(4):350-9.  
40  
41  
42 17. Godlee F, Jefferson T, editors. *Peer review in health sciences*.  
43 London: *BMJ Books*, 1999.  
44  
45  
46 18. Altman DG. The scandal of poor medical research. *BMJ* 1994;308:283-  
47 4.  
48  
49  
50 19. Jefferson T, Alderson P, Wager E, et al. Effects of peer review: A  
51 systematic review. *JAMA* 2002;287:2784-6.  
52  
53  
54  
55  
56  
57  
58  
59  
60

- 1  
2  
3 20. Schroter S, Black N, Evans S, et al. What errors do peer reviewers  
4 detect, and does training improve their ability to detect them? *J*  
5 *R Soc Med* 2008;101:507-14.  
6  
7  
8  
9 21. Glasziou P, Chalmers I, Altman DG, et al. Taking healthcare  
10 interventions from trial to practice. *BMJ* 2010;341:c3852.  
11  
12 22. Phelan M, Blenkinsopp A, Foster NE, et al. Pharmacists-led  
13 medication review for knee pain in older adults: Content, process  
14 and outcomes. *International Journal of Pharmacy Practice* 2008;16:  
15 347-55.  
16  
17  
18  
19  
20  
21  
22  
23  
24  
25  
26  
27  
28  
29  
30  
31  
32  
33  
34  
35  
36  
37  
38  
39  
40  
41  
42  
43  
44  
45  
46  
47  
48  
49  
50  
51  
52  
53  
54  
55  
56  
57  
58  
59  
60

1 **Table 1: Previous studies of adequacy of descriptions of treatments in trials.**

2

3

4 ***Clinical Issue***

5 ***Number***

6 ***of***

7 ***Trials***

8 ***Number (%)***

9 ***Replicable***

10 ***Methods of deciding replicability***

---

11 Weight loss interventions[3] 63 62 (98%) Compliance with item 4 of CONSORT statement\*

12 Treatments of brain tumours[4] 74 68 (92%) Compliance with item 4 of CONSORT statement\*

13 Treatments of Hodgkin's lymphoma[5] 241 231 (96%) Compliance with item 4 of CONSORT statement\*

14 Back pain[6] 24 3 (13%) Sufficient information on what happens before, during, and after treatment

15 Implementation of Guidelines[7] 29 < 7 (16%) Assessed 6 elements: flexibility, timing, content, medium, deliverer, receiver. There is not an overall adequacy rating, but none was 100% and only 7/29 gave timing

16 Insulin initiation in Type 2 diabetes[8] 14 3 (21%) Providing both starting dose and titration regime.

17 Surgical Procedures intended[9] 158 138 (87%) Only required that "some" detail was provided, not sufficient for replication; 41% also provided some detail on actual surgery administered.

18 Range of topics published in Evidence Based Medicine Journal[10] 55 36 (65%) Two general practitioners were independently asked whether they could use this treatment with a patient if they saw them tomorrow

---

19

20

21

22

23

24

25

26

27

28

29

30

31

32

33

34

35

36

37

38

39 \* Item 4 is: "Precise details of the treatments intended for each group and how and when they were actually administered"

40

41

42

43

44

45

46

47

48

49

1  
2  
3  
4  
5  
6  
7  
8  
9  
10  
11  
12  
13  
14  
15  
16  
17  
18  
19  
20  
21  
22  
23  
24  
25  
26  
27  
28  
29  
30  
31  
32  
33  
34  
35  
36  
37  
38  
39  
40  
41  
42  
43  
44  
45  
46  
47  
48  
49

Figure 1: Elements of interventions - percentage clearly described.

For peer review only

1 Figure 2: Papers where editors' or reviewers' identified a problem (pre-publication), and  
2 whether it remained at post-publication.  
3  
4  
5  
6  
7  
8  
9  
10  
11  
12  
13  
14  
15  
16  
17  
18  
19  
20  
21  
22  
23  
24  
25  
26  
27  
28  
29  
30  
31  
32  
33  
34  
35  
36  
37  
38  
39  
40  
41  
42  
43  
44  
45  
46  
47  
48  
49

For peer review only



**Table 2: Examples of problems identified at pre-publication and not fixed by time of publication.**

| Paper title                                                                                                                                                       | Type of problem identified at pre- and post-publication | Nature of the problem                                                                                             |
|-------------------------------------------------------------------------------------------------------------------------------------------------------------------|---------------------------------------------------------|-------------------------------------------------------------------------------------------------------------------|
| Partner notification of chlamydia infection in primary care: randomised controlled trial and analysis of resource use                                             | Procedure                                               | Not clear exactly what was done and when                                                                          |
| Didgeridoo playing as alternative treatment for obstructive sleep apnoea syndrome: randomised controlled trial                                                    | Intensity                                               | Description of didgeridoo practice times not clear                                                                |
| Treatment of low back pain by acupuncture and physical therapy: randomised controlled trial                                                                       | Procedure                                               | Can't tell how personalised the treatment was - who had what done and when                                        |
| Effect of enhanced psychosocial care on antipsychotic use in nursing home residents with severe dementia: cluster randomised trial                                | Procedure                                               | Complex intervention and what was received and when for both groups is unclear.                                   |
| Effect of patient completed agenda forms and doctors' education about the agenda on the outcome of consultations: randomised controlled trial                     | Recipient                                               | Recipient of intervention unclear                                                                                 |
| Effect of telephone contact on further suicide attempts in patients discharged from an emergency department: randomised controlled study                          | Procedure                                               | More detail needed on the content and duration of the phone calls ie effort involved to enhance compliance        |
| Effective control of dengue vectors with curtains and water container covers treated with insecticide in Mexico and Venezuela: cluster randomised trials          | Procedure                                               | Not clear why all the houses did not get nets and what they actually received                                     |
| Randomised controlled trial of four commercial weight loss programmes in the UK: initial findings from the BBC "diet trials"                                      | Procedure                                               | Not enough detail of the content of the programmes or time involved                                               |
| A randomised controlled trial of management strategies for acute infective conjunctivitis in general practice                                                     | Recipient                                               | Recipients poorly described re conjunctivitis inclusion/exclusion criteria                                        |
| Effectiveness of telephone counselling by a pharmacist in reducing mortality in patients receiving polypharmacy: randomised controlled trial                      | Procedure                                               | Not clear exactly what the pharmacists said or did. It must have been more than just a reminder phonecall.        |
| Telephone administered cognitive behaviour therapy for treatment of obsessive compulsive disorder: randomised controlled non-inferiority trial                    | Procedure                                               | The actual therapy provided is only very briefly described                                                        |
| Mobilisation with movement and exercise, corticosteroid injection, or wait and see for tennis elbow: randomised trial                                             | Procedure                                               | Not clear what the physiotherapy actually involved                                                                |
| Effectiveness of community physiotherapy and enhanced pharmacy review for knee pain in people aged over 55 presenting to primary care: pragmatic randomised trial | Procedure                                               | Not clear what happened and when. Content of pharmacist sessions unclear.<br>NB: Not fully described due to space |

1  
2  
3  
4  
5  
6  
7  
8  
9  
10  
11  
12  
13  
14  
15  
16  
17  
18  
19  
20  
21  
22  
23  
24  
25  
26  
27  
28  
29  
30  
31  
32  
33  
34  
35  
36  
37  
38  
39  
40  
41  
42  
43  
44  
45  
46  
47  
48  
49

|                                                                                                                                                     |           |                                                                                                                |
|-----------------------------------------------------------------------------------------------------------------------------------------------------|-----------|----------------------------------------------------------------------------------------------------------------|
|                                                                                                                                                     |           | limitations. More complete description of the pharmacy intervention subsequently published [22]                |
| Prevention of HIV and sexually transmitted diseases in high risk social networks of young Roma (Gypsy) men in Bulgaria: randomised controlled trial | Procedure | Intervention components versus what controls received not clear - need to know the details of the intervention |

For peer review only

**Box 1: Interventions checklist**

|           |                                                                                                                                  |                                                          |
|-----------|----------------------------------------------------------------------------------------------------------------------------------|----------------------------------------------------------|
| Setting   | Is it clear <b>where</b> the intervention was delivered?                                                                         | <input type="checkbox"/> Yes <input type="checkbox"/> No |
| Recipient | Is it clear <b>who is receiving</b> the intervention?                                                                            | <input type="checkbox"/> Yes <input type="checkbox"/> No |
| Provider  | Is it clear <b>who delivered</b> the intervention?                                                                               | <input type="checkbox"/> Yes <input type="checkbox"/> No |
| Procedure | Is the <b>procedure</b> (including the sequencing of the technique) of the intervention sufficiently clear to allow replication? | <input type="checkbox"/> Yes <input type="checkbox"/> No |
| Materials | Are the <b>physical or informational materials</b> used adequately described?                                                    | <input type="checkbox"/> Yes <input type="checkbox"/> No |
| Intensity | Is the <b>dose/duration of individual sessions</b> of the intervention clear?                                                    | <input type="checkbox"/> Yes <input type="checkbox"/> No |
| Schedule  | Is the <b>schedule (interval, frequency, duration, or timing)</b> of the intervention clear?                                     | <input type="checkbox"/> Yes <input type="checkbox"/> No |
| Missing   | Is there anything else <b>missing</b> from the description of the intervention?<br>If yes, what?                                 | <input type="checkbox"/> Yes <input type="checkbox"/> No |

1  
2  
3  
4  
5  
6  
7  
8  
9  
10  
11  
12  
13  
14  
15  
16  
17  
18  
19  
20  
21  
22  
23  
24  
25  
26  
27  
28  
29  
30  
31  
32  
33  
34  
35  
36  
37  
38  
39  
40  
41  
42  
43  
44  
45  
46  
47  
48  
49  
50  
51  
52  
53  
54  
55  
56  
57  
58  
59  
60

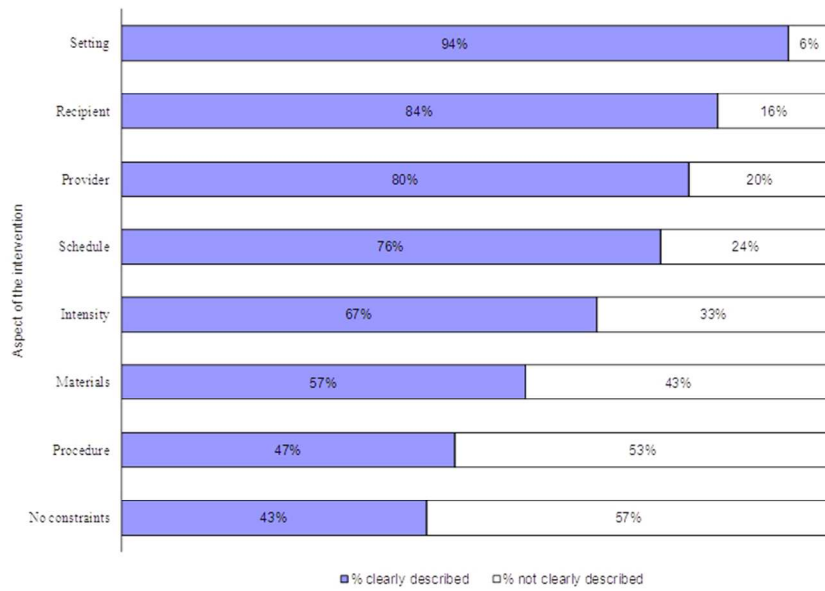

Figure 1: Elements of interventions - percentage clearly described.

review only

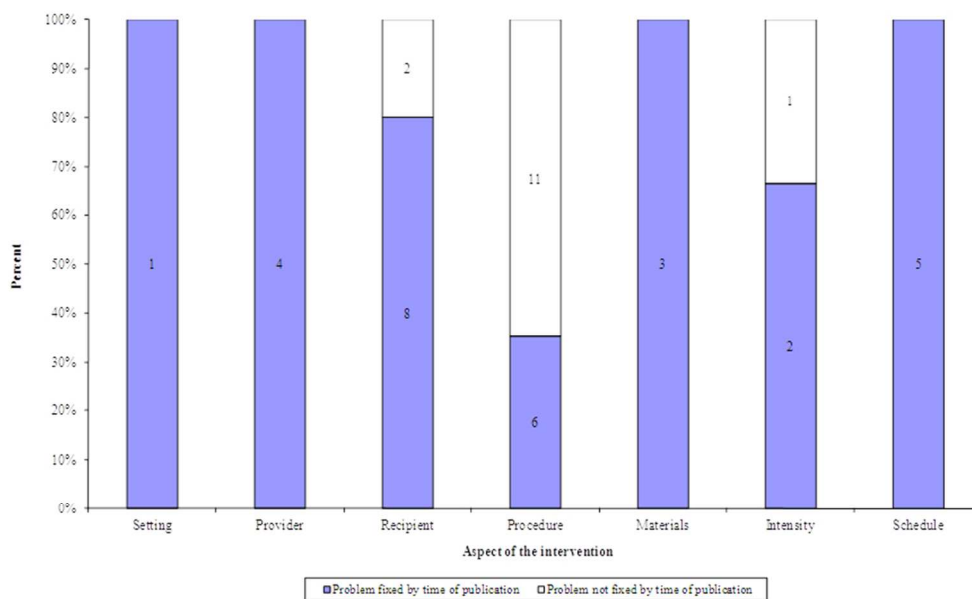

Figure 2: Papers where editors' or reviewers' identified a problem (pre-publication), and whether it remained at post-publication.

Review only

1  
2  
3  
4  
5  
6  
7  
8  
9  
10  
11  
12  
13  
14  
15  
16  
17  
18  
19  
20  
21  
22  
23  
24  
25  
26  
27  
28  
29  
30  
31  
32  
33  
34  
35  
36  
37  
38  
39  
40  
41  
42  
43  
44  
45  
46  
47  
48  
49  
50  
51  
52  
53  
54  
55  
56  
57  
58  
59  
60



**Quality of descriptions of treatments: A review of published randomised controlled trials**

|                                 |                                                                                                                                                              |
|---------------------------------|--------------------------------------------------------------------------------------------------------------------------------------------------------------|
| Journal:                        | <i>BMJ Open</i>                                                                                                                                              |
| Manuscript ID:                  | bmjopen-2012-001978.R1                                                                                                                                       |
| Article Type:                   | Research                                                                                                                                                     |
| Date Submitted by the Author:   | 02-Oct-2012                                                                                                                                                  |
| Complete List of Authors:       | Schroter, Sara; BMJ Editorial, Glasziou, Paul; Oxford University, Department of Primary Care, Heneghan, Carl; Oxford University, Department of Primary Care, |
| <b>Primary Subject Heading</b>: | Medical publishing and peer review                                                                                                                           |
| Secondary Subject Heading:      | Communication, Evidence based practice                                                                                                                       |
| Keywords:                       | GENERAL MEDICINE (see Internal Medicine), Protocols & guidelines < HEALTH SERVICES ADMINISTRATION & MANAGEMENT, JOURNALISM (see Medical Journalism)          |
|                                 |                                                                                                                                                              |

SCHOLARONE™  
Manuscripts

For peer review only

1  
2  
3 **Quality of descriptions of treatments:**

4  
5 **A review of published randomised controlled trials**

6  
7  
8  
9  
10 Sara Schroter (PhD),<sup>1,2</sup> Paul Glasziou (PhD),<sup>2</sup> Carl Heneghan (MRCGP)<sup>2</sup>

- 11  
12  
13  
14  
15  
16  
17  
18 1. BMJ Editorial, BMA House, Tavistock Square, London WC1H 9JR, UK  
19  
20  
21  
22 2. Centre for Evidence Based Medicine, Department of Primary Care,  
23  
24 Oxford University, Old Road Campus, Headington, Oxford, OX3 7LF,  
25  
26  
27 UK  
28  
29  
30  
31  
32  
33  
34

35 **Corresponding author:**

36 Dr Sara Schroter  
37 Senior Researcher  
38 BMJ Editorial  
39 BMA House  
40 Tavistock Square  
41 London WC1H 9JR

42  
43  
44 Tel: +44 20 7383 6744  
45 Fax: +44 20 7383 6418  
46 Email: [sschroter@bmj.com](mailto:sschroter@bmj.com)  
47  
48  
49  
50

51  
52 Word count: 2,462 words  
53  
54  
55  
56  
57  
58  
59  
60

**ABSTRACT**

**Objectives:** To be useable in clinical practice, treatments studied in trials must provide sufficient information to enable clinicians and researchers to replicate. We sought to assess the completeness of treatment descriptions in published randomised controlled trials using a checklist and to determine the extent to which peer reviewers and editors comment on the quality of reporting of treatments.

**Design:** Cross-sectional study.

**Setting:** Trials published in the BMJ, a general medical journal.

**Participants:** 51 trials published in the BMJ were independently evaluated by two raters using the checklist. Reviewers' and editors' comments were also assessed for statements on treatment descriptions.

**Primary and secondary outcome measures:** Proportion of trials rated as replicable (primary outcome).

**Results:** For 57% (29/51) of the papers, published treatment descriptions were not considered sufficient to allow replication. Most poorly described aspects were the actual procedures involved including the sequencing of the technique (what happened and when) and the physical or informational materials used (e.g. training materials): 53% and 43% not clear, respectively. For a third of treatments, the dose/duration of individual sessions was not clear and for a quarter the schedule (interval, frequency, duration, or timing) was not clear. Although the majority of problems were not picked up by reviewers and editors, when they were detected only about two-thirds were fixed before publication.



1  
2  
3 **Conclusions:** Journals wanting to publish research of use to practicing  
4 health care professionals need to pay more attention to descriptions  
5 of treatments. Our checklist, may be useful for reviewers, and  
6 editors and could help ensure important details of treatments are  
7 provided before papers are in the public domain.  
8  
9  
10  
11  
12  
13  
14  
15  
16  
17  
18  
19  
20  
21  
22  
23  
24  
25  
26  
27  
28  
29  
30  
31  
32  
33  
34  
35  
36  
37  
38  
39  
40  
41  
42  
43  
44  
45  
46  
47  
48  
49  
50  
51  
52  
53  
54  
55  
56  
57  
58  
59  
60

For peer review only

## ARTICLE SUMMARY

### *Article focus*

- For clinicians applying treatments, or researchers wishing to replicate or extend research findings, adequate treatment descriptions in publications are vital.
- We document the adequacy of reporting of different elements of descriptions of treatments in RCTs published in the BMJ; we determine the extent to which peer reviewers and editors comment on the adequacy of reporting of treatments, and correct these during the review process; and develop a simple checklist for use by editors and reviewers to enhance the reporting quality of published interventions.

### *Key messages*

- The majority of published trials in our study lacked important details describing the treatment. These details would be required for health care professionals to undertake these treatments in practice, and for other researchers to replicate, or build on, the findings in future studies.
- Although the majority of problems were not picked up by peer reviewers and editors, when they were detected only about two-thirds were fixed before publication.
- The incomplete treatment descriptions we found represent a substantial waste of the research budget, trial participants' time, and an opportunity cost for clinicians and patients.

### *Strengths and limitations of this study*

- This study systematically assesses the quality of descriptions of interventions in a general medical journal and reports on whether reviewers and editors detect and fix problems with the descriptions of treatments in trials.

- 1  
2  
3 • We included only RCTs in one general medical journal and the  
4 results may not be generalisable to other journals. However, the  
5 BMJ has a lengthy review process and is generally considered to  
6 publish high quality research so it is likely that the situation  
7 is worse for less influential lower impact factor journals with  
8 fewer resources.  
9  
10 • We used two raters who were both academic general practitioners  
11 to assess the manuscripts. However, none of the papers in this  
12 study described treatments that our raters found too specialised  
13 to evaluate so none were excluded.  
14  
15  
16  
17  
18  
19  
20  
21  
22  
23  
24  
25  
26  
27  
28  
29  
30  
31  
32  
33  
34  
35  
36  
37  
38  
39  
40  
41  
42  
43  
44  
45  
46  
47  
48  
49  
50  
51  
52  
53  
54  
55  
56  
57  
58  
59  
60

## INTRODUCTION

Before dissemination, innovations in treatment require two things: (i) valid research that demonstrates the treatment's effectiveness and (ii) a description of the treatment procedure sufficient to allow clinicians and others to apply the treatment in practice. Both elements require adequate reporting. The Consolidated Standards for Reporting Trials (CONSORT) statement on reporting randomised controlled trials (RCTs) [1] was developed to help authors and editors improve the reporting of RCTs and has been widely accepted. It has been influential in improving the quality of reporting trials' methods and results.[2] However, less attention has been given to the second element: the description of the treatment being tested. For clinicians applying treatments, or researchers who wish to replicate or extend the findings, adequate treatment descriptions are vital. Treatments vary considerably in their complexity. At one end of the extreme are simple drug trials with fixed dose drugs requiring only specification of the chemical entity, dose, frequency and duration of treatment. However, even drug treatments can require more detail if treatment requires titration, monitoring, complex delivery systems, or co-treatments. Non-drug treatments require these same elements, but a physical, educational, or psychological procedure - equivalent, of the chemical entity - is often far more complex. At the other extreme are multi-stage surgical procedures that may not be codifiable and require training in the institution that developed the procedure. Between these extremes are educational treatments, physical treatments such as physiotherapy, and psychological treatments.

Two of CONSORT's 22 items are directly relevant to clinicians wishing to apply treatments: the eligibility criteria for participants and the settings and locations where the data were collected (item 3), and precise details of the treatments intended for each group and how and when they were actually administered (item 4). Yet previous work has

1  
2  
3 suggested this may be insufficient to guide an adequate treatment  
4 description.[3-5] Table 1 shows previous studies findings on  
5 inadequate reporting of specific aspects of trial interventions within  
6 a range of treatment areas; for example, an evaluation of trials  
7 complying with item 4 of the CONSORT statement.[3-10]. Some attempts  
8 have been made to develop detailed specifications in some treatment  
9 areas. For example, Davidson et al [11] have outlined the minimal  
10 treatment detail to be described in research reports in behavioural  
11 medicine. In a similar vein, specific reporting checklists are being  
12 developed for some types of treatments such as herbal treatments[12]  
13 and homeopathy [13], which often require additional treatment details.  
14 None of these studies have systematically assessed the quality of  
15 descriptions of a series of interventions in a general medical journal  
16 using a checklist.  
17  
18  
19  
20  
21  
22  
23  
24  
25  
26  
27  
28

29 The purpose of our study was (i) to document the adequacy of reporting  
30 of the different elements of descriptions of treatments in RCTs  
31 published over one year in a large general medical journal (the BMJ);  
32 (ii) to determine the extent to which peer reviewers and editors  
33 comment on the adequacy of reporting of treatments, and correct these  
34 during the review process; and (iii) to develop a simple checklist for  
35 use by editors and reviewers to enhance the reporting quality of  
36 published interventions.  
37  
38  
39  
40  
41  
42  
43  
44  
45  
46  
47  
48  
49  
50  
51  
52  
53  
54  
55  
56  
57  
58  
59  
60

## METHODS

### Setting

We conducted the research in 2007 at the BMJ, a general medical journal, where we had access to all backmatter associated with journal submissions. The BMJ publishes research on a wide range of clinical topics.

### Development, refining and piloting of the checklist

Based on the work of Davidson et al[11], the CONSORT statement[1] and our own analysis of poorly reported trials abstracted in the journal Evidence Based Medicine[10], we designed an initial checklist of the minimal details that should be included in a description of a treatment in an RCT. We piloted this on the first 10 papers and then, based on problems identified, revised the checklist. The first 10 papers were then reevaluated with the revised checklist. The revised checklist (Box 1) included the following seven aspects: a description of where the treatment was delivered (setting); who delivered the treatment (provider); who received the treatment (recipient); details of the procedure including the sequencing of the technique (procedure); a description of the physical or informational materials used (materials); the dose/duration of individual sessions of the treatment (intensity); and the scheduling i.e. the interval, frequency, duration, or timing of the treatment (schedule). Raters also completed an additional subjective global item to indicate whether the treatment was sufficiently described for them to replicate it if there were no resource or training constraints (no constraints).

### Evaluation of published descriptions

We reviewed the given study design of all research papers published in the BMJ in a single year, 2006, and selected all RCTs for possible inclusion. Papers presenting only follow-up data or longer term

1  
2  
3 outcomes of a previously published trial were subsequently excluded as  
4 details of the intervention may previously have been reported. The  
5 full length version of the published papers was then independently  
6 evaluated by two raters (PG and CH) for the clarity of reporting of  
7 key features of the intervention using our checklist. Our use of the  
8 term intervention refers to "the process of intervening on people,  
9 groups, entities or objects in an experimental study"[14]. We did not  
10 evaluate the clarity of reporting of the treatment received by the  
11 control group. Both raters were blind to comments from editors and  
12 reviewers. Raters then discussed the results in person and  
13 disagreements were resolved through consensus discussion supervised by  
14 SS.  
15  
16  
17  
18  
19  
20  
21  
22  
23

### 24 25 **Evaluation of the review process**

26 All back history (reviewers' comments and editors' notes) for the  
27 papers were obtained by SS from the BMJ's electronic manuscript  
28 tracking system. SS collated all statements given on the clarity of  
29 the reporting of the treatment for each manuscript and anonymised the  
30 comments. SS then categorised the deficiencies using our checklist.  
31 PG then assessed whether the specified deficiencies had been addressed  
32 in the final published version.  
33  
34  
35  
36  
37  
38  
39  
40  
41  
42  
43  
44  
45  
46  
47  
48  
49  
50  
51  
52  
53  
54  
55  
56  
57  
58  
59  
60

## RESULTS

We included 51 RCTs published in the BMJ in 2006. These papers described studies with a wide range of settings and treatments. 21 (41%) involved the administration of a drug either alone or in addition to another therapy.

### **Replicability**

Overall, assuming no resource or training constraints, both raters reported that 57% (29/51) of the treatments could not be replicated based on the description of the treatment as published. Studies of drug treatments were better described than non-drug treatments: 7/21 (33%) of drug treatments were considered non-replicable in comparison with 22/30 (73%) non-drug treatments.

### **Type of problems identified in published versions**

We identified 99 problems with the descriptions of the interventions in the published versions. For each checklist item the proportion of trials with adequately described features ranged from 47% to 94% (Figure 1). The most poorly described aspects of the treatment were the actual procedures involved including the sequencing of the technique - what happened and when (53% not clear), and the physical or informational materials used e.g. training materials (43% not clear). Aspects of the treatment better described included a description of where the treatment was delivered (94% clear). For a third of the treatments described, the dose, duration, or both of individual sessions of the treatment were not clear and for around a quarter the schedule (interval, frequency, duration, or timing) of the treatment was not clear.

### **Problems identified prior to publication**

During the pre-publication phase of the manuscripts, the reviewers, editors and editorial advisors reported 43 problems with the



1  
2  
3 descriptions of the interventions. Most comments focused on the need  
4 for clarification of the sequencing of the technique described  
5 (procedure) and the patient group under study (recipient). Thirty  
6 three percent (14/43) of these problems were not fully fixed by the  
7 time the paper was published (as assessed by our raters) (Figure 2).  
8 Where reviewers and editors identified problems with descriptions of  
9 the setting, the provider, the materials, and the schedule, these were  
10 improved by the time of publication. Problems that were not corrected  
11 largely concerned the descriptions of the procedures of the treatments  
12 i.e. it was not clear what happened and when. Table 2 shows the 14  
13 problems identified at pre-publication which were not sufficiently  
14 remedied in the published version.  
15  
16  
17  
18  
19  
20  
21  
22  
23  
24  
25  
26  
27  
28  
29  
30  
31  
32  
33  
34  
35  
36  
37  
38  
39  
40  
41  
42  
43  
44  
45  
46  
47  
48  
49  
50  
51  
52  
53  
54  
55  
56  
57  
58  
59  
60

## DISCUSSION

The majority of published trials in our study lacked important details describing the treatment. These details would be required for health care professionals to undertake these treatments in practice, or for other researchers to replicate, or build on, the findings in future studies. Many problems were easily rectifiable, such as clearer reporting on the sequencing of techniques, actual doses/durations of treatments and their scheduling. Although the majority of problems were not picked up by peer reviewers and editors, when they were detected only about two-thirds were fixed before publication.

Our findings are consistent with our earlier analysis of 80 RCTs and systematic reviews published in the journal *Evidence Based Medicine* where approximately a half (51%) had an "inadequate" description of the treatment[10]. *Evidence Based Medicine* abstracts journals in a range of specialties and the similarity in results suggests that the results in this study are valid. Unlike, this study, our previous study did not quantitatively document the types of problems with the treatments described but focused on a global assessment of the replicability of the treatment and whether authors could provide the missing details when asked to do so. The current study went further than our earlier study in that it reports the frequency of poor reporting of specific aspects of trial interventions.[10]

Our study has several limitations. Firstly, we included only RCTs from a single year in one general medical journal and the results may not be generalisable to other journals. However, the BMJ has a lengthy review process and is generally considered to publish high quality research so it is likely that the situation is worse for less influential lower impact factor journals with fewer resources. The BMJ strives to publish papers to "help doctors make better decisions" and is very aware of the importance of good scientific reporting of

1  
2  
3 research. As such it may pay more attention to reporting issues than  
4 other journals. We found that the BMJ reported these aspects of  
5 interventions poorly and this suggests that the situation may well be  
6 worse for other journals. Secondly, we evaluated RCTs published in  
7 2006 and it is possible that there have been improvements in  
8 reporting, given the wider use of the internet and web appendices in  
9 recent years. Further research would be needed to test this.  
10  
11 Thirdly, we used only two raters who were both academic general  
12 practitioners to assess the manuscripts some of which could have  
13 described treatments they were not familiar with. However, all RCTs  
14 published in the BMJ describe treatments that should be familiar to  
15 general practitioners, as it targets a general medical readership.  
16  
17 None of the papers in this study described treatments that our raters  
18 found too specialised to evaluate so none were excluded. Our raters  
19 were also experienced academics interested in improving the reporting  
20 quality of trials and as such the results may represent the best case  
21 scenario. Finally, we did not try to separately assess planned versus  
22 actual treatment, which may sometimes differ substantially and require  
23 specific description[21].  
24  
25  
26  
27  
28  
29  
30  
31  
32  
33  
34  
35  
36

37  
38 We identified a few other previous studies which have examined the  
39 adequacy of treatment descriptions (Table 1). Most of the studies  
40 listed in Table 1 are likely to have reported overestimates of  
41 replicability as only one asked whether there was sufficient  
42 information to allow replication[10]. In developing summaries for  
43 systematic reviews of back pain, Glenton and colleagues[6] found  
44 sufficient detail "about what the treatment involved" for patients in  
45 only 3 of 24 (13%) treatments, and used 32 other sources to obtain  
46 details for the other 21 treatments. Similarly a review[7] of 29  
47 guideline implementation studies found that the majority lacked  
48 details of how the intervention was carried out, e.g., only 7 (24%)  
49 supplied details of timing. Three other studies simply checked the  
50  
51  
52  
53  
54  
55  
56  
57  
58  
59  
60

1  
2  
3 fourth CONSORT item[3-5]. Similar problems have been identified in  
4 other areas. In a recent survey[15] of 93 publications with novel  
5 questionnaires in JAMA, NEJM, and BMJ, four printed the questionnaire  
6 in the article, three provided online access, but authors failed to  
7 provide questionnaires for 37 of 81 (46%) studies. For some clinical  
8 domains, improving the descriptions of treatments may require  
9 additional work to standardise and document the procedures prior to  
10 clinical trials[16].  
11  
12  
13  
14  
15  
16

17  
18 Similar to many journals, BMJ authors are requested to complete the  
19 CONSORT statement when submitting a paper describing an RCT, but are  
20 not specifically asked to describe their interventions in detail. BMJ  
21 reviewers are not routinely instructed to comment on the replicability  
22 of treatments described in papers, but are instructed to check the  
23 CONSORT statement provided by the author. However, item 4 in the  
24 CONSORT statement appears insufficient to guide authors and reviewers  
25 in all the elements needed, and CONSORT have, so far, added three  
26 intervention extensions (non-pharmacological, herbal, and acupuncture  
27 - [www.consort-statement.org/extensions/](http://www.consort-statement.org/extensions/)), but these overlap, and a  
28 generic checklist with supplementary lists is needed.  
29  
30  
31  
32  
33  
34  
35  
36  
37  
38

39 Medical journals often send papers to reviewers who are practicing  
40 clinicians in the area of interest and some may choose to comment on  
41 the reporting details of the treatment. However, the limitations of  
42 peer review are well documented[17-20]. In our study, peer reviewers  
43 infrequently commented on inadequate reporting of trial details.  
44 Insufficient instructions and guidance to reviewers and lack of  
45 training may compound the problem. However, even when some  
46 limitations were identified by reviewers at the pre-publication stage  
47 they were not always remedied in the published version.  
48  
49  
50  
51  
52  
53  
54  
55  
56  
57  
58  
59  
60

1  
2  
3 The incomplete treatment descriptions we found represent a substantial  
4 waste of the research budget, trial participants' time, and an  
5 opportunity cost for clinicians and patients. Though not surprising,  
6 the lower rates of adequate description of non-drug alternatives is  
7 unfortunate given the rapid growth of the pharmaceuticals budget, and  
8 the potential for non-drug therapies for alternative treatments.  
9 Funders, authors, journals, and research users should all be concerned  
10 with this problem and work together to improve the situation[21].  
11 Journals that want to publish high quality research of use to  
12 practicing health care professionals need to pay attention to adequate  
13 descriptions of treatments. One element of any solution should be a  
14 simple checklist, such as the generic one we have developed, or  
15 specific checklists such as the CONSORT interventions extensions  
16 (<http://www.consort-statement.org/extensions/>). Such checklists may  
17 be useful for authors, peer reviewers, and editors to help ensure that  
18 important details of treatments are provided before the paper is  
19 published and in the public domain. However, the effectiveness of  
20 such checklists needs to be further evaluated. Ideally the full  
21 intervention description should be published with the primary article,  
22 but this often is not feasible, e.g, with manual procedures or  
23 extensive training materials. Since describing such study materials  
24 could add significantly to the length of papers we suggest that  
25 editors encourage the use of webextras and/or links to study materials  
26 on authors' or funders' institutional websites; these should be checked  
27 for availability at the time of publication, since researchers may  
28 retire, move, or for other reasons not respond after publication.  
29  
30  
31  
32  
33  
34  
35  
36  
37  
38  
39  
40  
41  
42  
43  
44  
45  
46  
47  
48  
49  
50  
51  
52  
53  
54  
55  
56  
57  
58  
59  
60

## Acknowledgements

We thank the BMJ Group for SS's time on this project.

## Contributorship

SS had full access to all the data in the study and takes responsibility for the integrity of the data and the accuracy of the data analysis. No other staff at the BMJ were involved in the design and conduct of the study; collection, management, analysis, and interpretation of the data; and preparation, review, or approval of the manuscript. SS, PG and CH designed the study; PG and CH rated the manuscripts for replicability; SS analysed the manuscripts' backmatter; SS analysed the data; SS, PG and CH wrote the manuscript.

## Funding

This research received no specific grant from any funding agency in the public, commercial or not-for-profit sectors.

The University Department of Primary Health Care is part of the NIHR School of Primary Care Research which provides financial support for senior staff who contributed to this paper. The opinions are those of the authors and not of the Department of Health.

## Competing interests

SS is employed full time by BMJ Group.

## Ethics

We did not seek ethics committee approval for this study as it mainly involved the evaluation of published manuscripts in the public domain. Only SS had access to named reviewers' and editors' comments but is a full time employee of the BMJ Publishing Group and regularly reads such material as part of her job. On submitting to the BMJ, prospective authors are informed that their paper may be enrolled in a

1  
2  
3 research study as part of improving the peer review process and are  
4 given the opportunity to opt out of this.  
5  
6

7  
8 **Data sharing**

9  
10 The checklist responses for each trial alongside an indication of  
11 whether a problem with the description of the intervention was  
12 reported prior to publication are available as a dataset on Dryad:  
13 doi:10.5061/dryad.c1jv0.  
14  
15  
16  
17  
18  
19  
20  
21  
22  
23  
24  
25  
26  
27  
28  
29  
30  
31  
32  
33  
34  
35  
36  
37  
38  
39  
40  
41  
42  
43  
44  
45  
46  
47  
48  
49  
50  
51  
52  
53  
54  
55  
56  
57  
58  
59  
60

## REFERENCES

1. Moher D, Schulz KF, Altman DG, et al. The CONSORT Statement: Revised Recommendations for Improving the Quality of Reports of Parallel-Group Randomized Trials. *Ann Intern Med* 2001;134:657-62.
2. Plint AC, Moher D, Morrison A, et al. Does the CONSORT checklist improve the quality of reports of randomised controlled trials? A systematic review. *Med J Aust* 2006;185(5):263-7.
3. Thabane L, Chu R, Cuddy K, et al. What is the quality of reporting in weight loss intervention studies? A systematic review of randomized controlled trials. *Int J Obes (Lond)* 2007;31(10):1554-9.
4. Kober T, Trelle S, Engert A. Reporting of randomized controlled trials in Hodgkin lymphoma in biomedical journals. *J Natl Cancer Inst* 2006;98(9):620-5.
5. Lai R, Chu R, Fraumeni M, et al. Quality of randomized controlled trials reporting in the primary treatment of brain tumors. *J Clin Oncol* 2006;24(7):1136-44.
6. Glenton C, Underland V, Kho M, et al. Summaries of findings, descriptions of treatments, and information about adverse effects would make reviews more informative. *J Clin Epidemiol* 2006;59(8):770-8. Epub 2006 May 30.
7. Thorsen T & Makela M (eds). Changing Professional Practice Theory and Practice of Clinical Guidelines Implementation. Danish Institute for Health Services Research and Development, 1999. <http://www.dsi.dk>
8. Lasserson DS, Glasziou PP, Perera R, et al. Initiating insulin regimens to achieve intensive glycaemic control for people with type 2 diabetes mellitus. Society for Academic Primary Care Conference, 2006.
9. Jacquier I, Boutron I, Moher D, et al. The Reporting of Randomized Clinical Trials Using a Surgical Intervention Is in Need of



- 1  
2  
3 Immediate Improvement A Systematic Review. *Ann Surg* 2006;244: 677-  
4 83.  
5  
6  
7 10. Glasziou P, Meats E, Heneghan C, et al. What is missing from  
8 descriptions of treatment in trials and reviews? *BMJ* 2008;336:1472-  
9 4.  
10  
11  
12 11. Davidson KW, Goldstein M, Kaplan RM, et al. Evidence-based  
13 behavioral medicine: what is it and how do we achieve it? *Ann*  
14 *Behav Med* 2003;26(3):161-71.  
15  
16  
17 12. Gagnier JJ, Boon H, Rochon P, et al. Reporting Randomized,  
18 Controlled Trials of Herbal Interventions: An Elaborated CONSORT  
19 Statement. *Ann Intern Med* 2006;144:364-7.  
20  
21  
22 13. Dean ME, Morag K, Coulter MK, et al. Reporting Data on Homeopathic  
23 Treatments (RedHot): A Supplement to CONSORT. *Forsch*  
24 *Komplementarmed* 2006;13:368-71.  
25  
26  
27 14. <http://www.cochrane.org/sites/default/files/uploads/glossary.pdf>.  
28 [Accessed 30 July 2012].  
29  
30  
31 15. Schilling LM, Kozak K, Lundahl K, et al. Inaccessible novel  
32 questionnaires in published medical research: hidden methods,  
33 hidden costs. *Am J Epidemiol* 2006;164(12):1141-4. Epub 2006 Oct 13.  
34  
35  
36 16. Pomeroy VM, Cooke E, Hamilton S, et al. Development of a schedule  
37 of current physiotherapy treatment used to improve movement control  
38 and functional use of the lower limb after stroke: a precursor to a  
39 clinical trial. *Neurorehabil Neural Repair* 2005;19(4):350-9.  
40  
41  
42 17. Godlee F, Jefferson T, editors. *Peer review in health sciences*.  
43 London: *BMJ Books*, 1999.  
44  
45  
46 18. Altman DG. The scandal of poor medical research. *BMJ* 1994;308:283-  
47 4.  
48  
49  
50 19. Jefferson T, Alderson P, Wager E, et al. Effects of peer review: A  
51 systematic review. *JAMA* 2002;287:2784-6.  
52  
53  
54  
55  
56  
57  
58  
59  
60

- 1  
2  
3 20. Schroter S, Black N, Evans S, et al. What errors do peer reviewers  
4 detect, and does training improve their ability to detect them? *J*  
5 *R Soc Med* 2008;101:507-14.  
6  
7  
8  
9 21. Glasziou P, Chalmers I, Altman DG, et al. Taking healthcare  
10 interventions from trial to practice. *BMJ* 2010;341:c3852.  
11  
12 22. Phelan M, Blenkinsopp A, Foster NE, et al. Pharmacists-led  
13 medication review for knee pain in older adults: Content, process  
14 and outcomes. *International Journal of Pharmacy Practice* 2008;16:  
15 347-55.  
16  
17  
18  
19  
20  
21  
22  
23  
24  
25  
26  
27  
28  
29  
30  
31  
32  
33  
34  
35  
36  
37  
38  
39  
40  
41  
42  
43  
44  
45  
46  
47  
48  
49  
50  
51  
52  
53  
54  
55  
56  
57  
58  
59  
60

1 **Table 1: Previous studies of adequacy of descriptions of treatments in trials.**

2

3

4 ***Clinical Issue***

5 ***Number***

6 ***of***

7 ***Trials***

8 ***Number (%)***

9 ***Replicable***

10 ***Methods of deciding replicability***

---

11 Weight loss interventions[3] 63 62 (98%) Compliance with item 4 of CONSORT statement\*

12 Treatments of brain tumours[4] 74 68 (92%) Compliance with item 4 of CONSORT statement\*

13 Treatments of Hodgkin's lymphoma[5] 241 231 (96%) Compliance with item 4 of CONSORT statement\*

14 Back pain[6] 24 3 (13%) Sufficient information on what happens before, during, and after treatment

15 Implementation of Guidelines[7] 29 < 7 (16%) Assessed 6 elements: flexibility, timing, content, medium, deliverer, receiver. There is not an overall adequacy rating, but none was 100% and only 7/29 gave timing

16 Insulin initiation in Type 2 diabetes[8] 14 3 (21%) Providing both starting dose and titration regime.

17 Surgical Procedures intended[9] 158 138 (87%) Only required that "some" detail was provided, not sufficient for replication; 41% also provided some detail on actual surgery administered.

18 Range of topics published in Evidence Based Medicine Journal[10] 55 36 (65%) Two general practitioners were independently asked whether they could use this treatment with a patient if they saw them tomorrow

---

19

20

21

22

23

24

25

26

27

28

29

30

31

32

33

34

35

36

37

38

39 \* Item 4 is: "Precise details of the treatments intended for each group and how and when they were actually administered"

40

41

42

43

44

45

46

47

48

49

1 **Figure 1: Elements of interventions - percentage clearly described.**  
2  
3  
4  
5

6 Note: Each element is fully described in Box 1.  
7  
8  
9  
10  
11  
12  
13  
14  
15  
16  
17  
18  
19  
20  
21  
22  
23  
24  
25  
26  
27  
28  
29  
30  
31  
32  
33  
34  
35  
36  
37  
38  
39  
40  
41  
42  
43  
44  
45

For peer review only

1  
2  
3  
4  
5  
6  
7  
8  
9  
10  
11  
12  
13  
14  
15  
16  
17  
18  
19  
20  
21  
22  
23  
24  
25  
26  
27  
28  
29  
30  
31  
32  
33  
34  
35  
36  
37  
38  
39  
40  
41  
42  
43  
44  
45  
46  
47  
48  
49

Figure 2: Papers where editors' or reviewers' identified a problem (pre-publication), and whether it remained at post-publication.

Note: Each element is fully described in Box 1.

For peer review only

**Table 2: Examples of problems identified at pre-publication and not fixed by time of publication.**

| Paper title                                                                                                                                                       | Type of problem identified at pre- and post-publication | Nature of the problem                                                                                             |
|-------------------------------------------------------------------------------------------------------------------------------------------------------------------|---------------------------------------------------------|-------------------------------------------------------------------------------------------------------------------|
| Partner notification of chlamydia infection in primary care: randomised controlled trial and analysis of resource use                                             | Procedure                                               | Not clear exactly what was done and when                                                                          |
| Didgeridoo playing as alternative treatment for obstructive sleep apnoea syndrome: randomised controlled trial                                                    | Intensity                                               | Description of didgeridoo practice times not clear                                                                |
| Treatment of low back pain by acupuncture and physical therapy: randomised controlled trial                                                                       | Procedure                                               | Can't tell how personalised the treatment was - who had what done and when                                        |
| Effect of enhanced psychosocial care on antipsychotic use in nursing home residents with severe dementia: cluster randomised trial                                | Procedure                                               | Complex intervention and what was received and when for both groups is unclear.                                   |
| Effect of patient completed agenda forms and doctors' education about the agenda on the outcome of consultations: randomised controlled trial                     | Recipient                                               | Recipient of intervention unclear                                                                                 |
| Effect of telephone contact on further suicide attempts in patients discharged from an emergency department: randomised controlled study                          | Procedure                                               | More detail needed on the content and duration of the phone calls ie effort involved to enhance compliance        |
| Effective control of dengue vectors with curtains and water container covers treated with insecticide in Mexico and Venezuela: cluster randomised trials          | Procedure                                               | Not clear why all the houses did not get nets and what they actually received                                     |
| Randomised controlled trial of four commercial weight loss programmes in the UK: initial findings from the BBC "diet trials"                                      | Procedure                                               | Not enough detail of the content of the programmes or time involved                                               |
| A randomised controlled trial of management strategies for acute infective conjunctivitis in general practice                                                     | Recipient                                               | Recipients poorly described re conjunctivitis inclusion/exclusion criteria                                        |
| Effectiveness of telephone counselling by a pharmacist in reducing mortality in patients receiving polypharmacy: randomised controlled trial                      | Procedure                                               | Not clear exactly what the pharmacists said or did. It must have been more than just a reminder phonecall.        |
| Telephone administered cognitive behaviour therapy for treatment of obsessive compulsive disorder: randomised controlled non-inferiority trial                    | Procedure                                               | The actual therapy provided is only very briefly described                                                        |
| Mobilisation with movement and exercise, corticosteroid injection, or wait and see for tennis elbow: randomised trial                                             | Procedure                                               | Not clear what the physiotherapy actually involved                                                                |
| Effectiveness of community physiotherapy and enhanced pharmacy review for knee pain in people aged over 55 presenting to primary care: pragmatic randomised trial | Procedure                                               | Not clear what happened and when. Content of pharmacist sessions unclear.<br>NB: Not fully described due to space |

1  
2  
3  
4  
5  
6  
7  
8  
9  
10  
11  
12  
13  
14  
15  
16  
17  
18  
19  
20  
21  
22  
23  
24  
25  
26  
27  
28  
29  
30  
31  
32  
33  
34  
35  
36  
37  
38  
39  
40  
41  
42  
43  
44  
45  
46  
47  
48  
49

|                                                                                                                                                     |           |                                                                                                                |
|-----------------------------------------------------------------------------------------------------------------------------------------------------|-----------|----------------------------------------------------------------------------------------------------------------|
|                                                                                                                                                     |           | limitations. More complete description of the pharmacy intervention subsequently published [22]                |
| Prevention of HIV and sexually transmitted diseases in high risk social networks of young Roma (Gypsy) men in Bulgaria: randomised controlled trial | Procedure | Intervention components versus what controls received not clear - need to know the details of the intervention |

For peer review only

**Box 1: Interventions checklist**

|           |                                                                                                                                  |                                                          |
|-----------|----------------------------------------------------------------------------------------------------------------------------------|----------------------------------------------------------|
| Setting   | Is it clear <b>where</b> the intervention was delivered?                                                                         | <input type="checkbox"/> Yes <input type="checkbox"/> No |
| Recipient | Is it clear <b>who is receiving</b> the intervention?                                                                            | <input type="checkbox"/> Yes <input type="checkbox"/> No |
| Provider  | Is it clear <b>who delivered</b> the intervention?                                                                               | <input type="checkbox"/> Yes <input type="checkbox"/> No |
| Procedure | Is the <b>procedure</b> (including the sequencing of the technique) of the intervention sufficiently clear to allow replication? | <input type="checkbox"/> Yes <input type="checkbox"/> No |
| Materials | Are the <b>physical or informational materials</b> used adequately described?                                                    | <input type="checkbox"/> Yes <input type="checkbox"/> No |
| Intensity | Is the <b>dose/duration of individual sessions</b> of the intervention clear?                                                    | <input type="checkbox"/> Yes <input type="checkbox"/> No |
| Schedule  | Is the <b>schedule (interval, frequency, duration, or timing)</b> of the intervention clear?                                     | <input type="checkbox"/> Yes <input type="checkbox"/> No |
| Missing   | Is there anything else <b>missing</b> from the description of the intervention?<br>If yes, what?                                 | <input type="checkbox"/> Yes <input type="checkbox"/> No |



1  
2  
3  
4  
5  
6  
7  
8  
9 **Quality of descriptions of treatments:**

10 **A review of published randomised controlled trials**

11  
12  
13  
14  
15 Sara Schroter (PhD),<sup>1,2</sup> Paul Glasziou (PhD),<sup>2</sup> Carl Heneghan (MRCGP)<sup>2</sup>

- 16  
17  
18  
19  
20  
21 1. BMJ Editorial, BMA House, Tavistock Square, London WC1H 9JR, UK  
22  
23  
24 2. Centre for Evidence Based Medicine, Department of Primary Care,  
25  
26 Oxford University, Old Road Campus, Headington, Oxford, OX3 7LF,  
27  
28 UK  
29  
30  
31  
32  
33

34 **Corresponding author:**

35 Dr Sara Schroter  
36 Senior Researcher  
37 BMJ Editorial  
38 BMA House  
39 Tavistock Square  
40 London WC1H 9JR  
41  
42 Tel: +44 20 7383 6744  
43 Fax: +44 20 7383 6418  
44 Email: [sschroter@bmj.com](mailto:sschroter@bmj.com)  
45

46  
47 | Word count: 2, ~~462341~~ words  
48  
49  
50  
51  
52  
53  
54  
55  
56  
57  
58  
59  
60

**ABSTRACT**

**Objectives:** To be useable in clinical practice, treatments studied in trials must provide sufficient information to enable clinicians and researchers to replicate. We sought to assess the completeness of treatment descriptions in published randomised controlled trials using a checklist and to determine the extent to which peer reviewers and editors comment on the quality of reporting of treatments.

**Design:** Cross-sectional study.

**Setting:** Trials published in the BMJ, a general medical journal.

**Participants:** 51 trials published in the BMJ were independently evaluated by two raters using the checklist. Reviewers' and editors' comments were also assessed for statements on treatment descriptions.

**Primary and secondary outcome measures:** Proportion of trials rated as replicable (primary outcome).

**Results:** For 57% (29/51) of the papers, published treatment descriptions were not considered sufficient to allow replication. Most poorly described aspects were the actual procedures involved including the sequencing of the technique (what happened and when) and the physical or informational materials used (e.g. training materials): 53% and 43% not clear, respectively. For a third of treatments, the dose/duration of individual sessions was not clear and for a quarter the schedule (interval, frequency, duration, or timing) was not clear. Although the majority of problems were not picked up by reviewers and editors, when they were detected only about two-thirds were fixed before publication.

1  
2  
3  
4  
5  
6  
7  
8  
9  
10  
11  
12  
13  
14  
15  
16  
17  
18  
19  
20  
21  
22  
23  
24  
25  
26  
27  
28  
29  
30  
31  
32  
33  
34  
35  
36  
37  
38  
39  
40  
41  
42  
43  
44  
45  
46  
47  
48  
49  
50  
51  
52  
53  
54  
55  
56  
57  
58  
59  
60

**Conclusions:** Journals wanting to publish research of use to practicing health care professionals need to pay more attention to descriptions of treatments. Our checklist, may be useful for reviewers, and editors and could help ensure important details of treatments are provided before papers are in the public domain.

For peer review only

**ARTICLE SUMMARY****Article focus**

- For clinicians applying treatments, or researchers wishing to replicate or extend research findings, adequate treatment descriptions in publications are vital.
- We document the adequacy of reporting of different elements of descriptions of treatments in RCTs published in the BMJ; we determine the extent to which peer reviewers and editors comment on the adequacy of reporting of treatments, and correct these during the review process; and develop a simple checklist for use by editors and reviewers to enhance the reporting quality of published interventions.

**Key messages**

- The majority of published trials in our study lacked important details describing the treatment. These details would be required for health care professionals to undertake these treatments in practice, and for other researchers to replicate, or build on, the findings in future studies.
- Although the majority of problems were not picked up by peer reviewers and editors, when they were detected only about two-thirds were fixed before publication.
- The incomplete treatment descriptions we found represent a substantial waste of the research budget, trial participants' time, and an opportunity cost for clinicians and patients.

**Strengths and limitations of this study**

- This study systematically assesses the quality of descriptions of interventions in a general medical journal and reports on whether reviewers and editors detect and fix problems with the descriptions of treatments in trials.

- 1  
2  
3  
4  
5  
6  
7  
8  
9 • We included only RCTs in one general medical journal and the  
10 results may not be generalisable to other journals. However, the  
11 BMJ has a lengthy review process and is generally considered to  
12 publish high quality research so it is likely that the situation  
13 is worse for less influential lower impact factor journals with  
14 fewer resources.  
15  
16 • We used two raters who were both academic general practitioners  
17 to assess the manuscripts. However, none of the papers in this  
18 study described treatments that our raters found too specialised  
19 to evaluate so none were excluded.  
20  
21  
22  
23  
24  
25  
26  
27  
28  
29  
30  
31  
32  
33  
34  
35  
36  
37  
38  
39  
40  
41  
42  
43  
44  
45  
46  
47  
48  
49  
50  
51  
52  
53  
54  
55  
56  
57  
58  
59  
60

## INTRODUCTION

Before dissemination, innovations in treatment require two things: (i) valid research that demonstrates the treatment's effectiveness and (ii) a description of the treatment procedure sufficient to allow clinicians and others to apply the treatment in practice. Both elements require adequate reporting. The Consolidated Standards for Reporting Trials (CONSORT) statement on reporting randomised controlled trials (RCTs) [1] was developed to help authors and editors improve the reporting of RCTs and has been widely accepted. It has been influential in improving the quality of reporting trials' methods and results.[2] However, less attention has been given to the second element: the description of the treatment being tested. For clinicians applying treatments, or researchers who wish to replicate or extend the findings, adequate treatment descriptions are vital. Treatments vary considerably in their complexity. At one end of the extreme are simple drug trials with fixed dose drugs requiring only specification of the chemical entity, dose, frequency and duration of treatment. However, even drug treatments can require more detail if treatment requires titration, monitoring, complex delivery systems, or co-treatments. Non-drug treatments require these same elements, but a physical, educational, or psychological procedure - equivalent, of the chemical entity - is often far more complex. At the other extreme are multi-stage surgical procedures that may not be codifiable and require training in the institution that developed the procedure. Between these extremes are educational treatments, physical treatments such as physiotherapy, and psychological treatments.

Two of CONSORT's 22 items are directly relevant to clinicians wishing to apply treatments: the eligibility criteria for participants and the settings and locations where the data were collected (item 3), and precise details of the treatments intended for each group and how and when they were actually administered (item 4). Yet previous work has

1  
2  
3  
4  
5  
6  
7  
8  
9 suggested this may be insufficient to guide an adequate treatment  
10 description.[3-5] Table 1 shows previous studies findings on  
11 inadequate reporting of specific aspects of trial interventions within  
12 a range of treatment areas; for example, an evaluation of trials  
13 complying with item 4 of the CONSORT statement.[3-10]. Some attempts  
14 have been made to develop detailed specifications in some treatment  
15 areas. For example, Davidson et al [11] have outlined the minimal  
16 treatment detail to be described in research reports in behavioural  
17 medicine. In a similar vein, specific reporting checklists are being  
18 developed for some types of treatments such as herbal treatments[12]  
19 and homeopathy [13], which often require additional treatment details.  
20 None of these studies have systematically assessed the quality of  
21 descriptions of a series of interventions in a general medical journal  
22 using a checklist.  
23  
24  
25  
26  
27

28  
29 The purpose of our study was (i) to document the adequacy of reporting  
30 of the different elements of descriptions of treatments in RCTs  
31 published over one year in a large general medical journal (the BMJ);  
32 (ii) to determine the extent to which peer reviewers and editors  
33 comment on the adequacy of reporting of treatments, and correct these  
34 during the review process; and (iii) to develop a simple checklist for  
35 use by editors and reviewers to enhance the reporting quality of  
36 published interventions.  
37  
38  
39  
40  
41  
42  
43  
44  
45  
46  
47  
48  
49  
50  
51  
52  
53  
54  
55  
56  
57  
58  
59  
60

## METHODS

### Setting

We conducted the research in 2007 at the BMJ, a general medical journal, where we had access to all backmatter associated with journal submissions. The BMJ publishes research on a wide range of clinical topics.

### **Development, refining and piloting of the checklist**

Based on the work of Davidson et al[11], the CONSORT statement[1] and our own analysis of poorly reported trials abstracted in the journal Evidence Based Medicine[10], we designed an initial checklist of the minimal details that should be included in a description of a treatment in an RCT. We piloted this on the first 10 papers and then, based on problems identified, revised the checklist. The first 10 papers were then reevaluated with the revised checklist. The revised checklist (Box 1) included the following seven aspects: a description of where the treatment was delivered (setting); who delivered the treatment (provider); who received the treatment (recipient); details of the procedure including the sequencing of the technique (procedure); a description of the physical or informational materials used (materials); the dose/duration of individual sessions of the treatment (intensity); and the scheduling i.e. the interval, frequency, duration, or timing of the treatment (schedule). Raters also completed an additional subjective global item to indicate whether the treatment was sufficiently described for them to replicate it if there were no resource or training constraints (no constraints).

### **Evaluation of published descriptions**

We reviewed the given study design of all research papers published in the BMJ in a single year, 2006, and selected all RCTs for possible inclusion. Papers presenting only follow-up data or longer term



1  
2  
3  
4  
5  
6  
7  
8  
9 outcomes of a previously published trial were subsequently excluded as  
10 details of the intervention may previously have been reported. The  
11 full length version of the published papers was then independently  
12 evaluated by two raters (PG and CH) for the clarity of reporting of  
13 key features of the intervention using our checklist. Our use of the  
14 term intervention refers to "the process of intervening on people,  
15 groups, entities or objects in an experimental study"[14]. We did not  
16 evaluate the clarity of reporting of the treatment received by the  
17 control group. Both raters were blind to comments from editors and  
18 reviewers. Raters then discussed the results in person and  
19 disagreements were resolved through consensus discussion supervised by  
20 SS.  
21  
22  
23  
24

#### 25 26 **Evaluation of the review process**

27 All back history (reviewers' comments and editors' notes) for the  
28 papers were obtained by SS from the BMJ's electronic manuscript  
29 tracking system. SS collated all statements given on the clarity of  
30 the reporting of the treatment for each manuscript and anonymised the  
31 comments. SS then categorised the deficiencies using our checklist.  
32 PG then assessed whether the specified deficiencies had been addressed  
33 in the final published version.  
34  
35  
36  
37  
38  
39  
40  
41  
42  
43  
44  
45  
46  
47  
48  
49  
50  
51  
52  
53  
54  
55  
56  
57  
58  
59  
60

## RESULTS

We included 51 RCTs published in the BMJ in 2006. These papers described studies with a wide range of settings and treatments. 21 (41%) involved the administration of a drug either alone or in addition to another therapy.

### Replicability

Overall, assuming no resource or training constraints, both raters reported that 57% (29/51) of the treatments could not be replicated based on the description of the treatment as published. Studies of drug treatments were better described than non-drug treatments: 7/21 (33%) of drug treatments were considered non-replicable in comparison with 22/30 (73%) non-drug treatments.

### Type of problems identified in published versions

We identified 99 problems with the descriptions of the interventions in the published versions. For each checklist item the proportion of trials with adequately described features ranged from 47% to 94% (Figure 1). The most poorly described aspects of the treatment were the actual procedures involved including the sequencing of the technique - what happened and when (53% not clear), and the physical or informational materials used e.g. training materials (43% not clear). Aspects of the treatment better described included a description of where the treatment was delivered (94% clear). For a third of the treatments described, the dose, duration, or both of individual sessions of the treatment were not clear and for around a quarter the schedule (interval, frequency, duration, or timing) of the treatment was not clear.

### Problems identified prior to publication

During the pre-publication phase of the manuscripts, the reviewers, editors and editorial advisors reported 43 problems with the

1  
2  
3  
4  
5  
6  
7  
8  
9 descriptions of the interventions. Most comments focused on the need  
10 for clarification of the sequencing of the technique described  
11 (procedure) and the patient group under study (recipient). Thirty  
12 three percent (14/43) of these problems were not fully fixed by the  
13 time the paper was published (as assessed by our raters) (Figure 2).  
14 Where reviewers and editors identified problems with descriptions of  
15 the setting, the provider, the materials, and the schedule, these were  
16 improved by the time of publication. Problems that were not corrected  
17 largely concerned the descriptions of the procedures of the treatments  
18 i.e. it was not clear what happened and when. Table 2 shows the 14  
19 problems identified at pre-publication which were not sufficiently  
20 remedied in the published version.  
21  
22  
23  
24  
25  
26  
27  
28  
29  
30  
31  
32  
33  
34  
35  
36  
37  
38  
39  
40  
41  
42  
43  
44  
45  
46  
47  
48  
49  
50  
51  
52  
53  
54  
55  
56  
57  
58  
59  
60

## DISCUSSION

The majority of published trials in our study lacked important details describing the treatment. These details would be required for health care professionals to undertake these treatments in practice, or for other researchers to replicate, or build on, the findings in future studies. Many problems were easily rectifiable, such as clearer reporting on the sequencing of techniques, actual doses/durations of treatments and their scheduling. Although the majority of problems were not picked up by peer reviewers and editors, when they were detected only about two-thirds were fixed before publication.

Our findings are consistent with our earlier analysis of 80 RCTs and systematic reviews published in the journal *Evidence Based Medicine* where approximately a half (51%) had an "inadequate" description of the treatment[10]. *Evidence Based Medicine* abstracts journals in a range of specialties and the similarity in results suggests that the results in this study are valid. Unlike, this study, our previous study did not quantitatively document the types of problems with the treatments described but focused on a global assessment of the replicability of the treatment and whether authors could provide the missing details when asked to do so. The current study went further than our earlier study in that it reports the frequency of poor reporting of specific aspects of trial interventions.[10]

Our study has several limitations. Firstly, we included only RCTs from a single year in one general medical journal and the results may not be generalisable to other journals. However, the BMJ has a lengthy review process and is generally considered to publish high quality research so it is likely that the situation is worse for less influential lower impact factor journals with fewer resources. The BMJ strives to publish papers to "help doctors make better decisions" and is very aware of the importance of good scientific reporting of

1  
2  
3  
4  
5  
6  
7  
8  
9 research. As such it may pay more attention to reporting issues than  
10 other journals. We found that the BMJ reported these aspects of  
11 interventions poorly and this suggests that the situation may well be  
12 worse for other journals. Secondly, we evaluated RCTs published in  
13 2006 and it is possible that there have been improvements in  
14 reporting, given the wider use of the internet and web appendices in  
15 recent years. Further research would be needed to test this.  
16 Thirdly, we used only two raters who were both academic general  
17 practitioners to assess the manuscripts some of which could have  
18 described treatments they were not familiar with. However, all RCTs  
19 published in the BMJ describe treatments that should be familiar to  
20 general practitioners, as it targets a general medical readership.  
21 None of the papers in this study described treatments that our raters  
22 found too specialised to evaluate so none were excluded. Our raters  
23 were also experienced academics interested in improving the reporting  
24 quality of trials and as such the results may represent the best case  
25 scenario. Finally, we did not try to separately assess planned versus  
26 actual treatment, which may sometimes differ substantially and require  
27 specific description[21].  
28  
29  
30  
31  
32  
33  
34  
35

36 We identified a few other previous studies which have examined the  
37 adequacy of treatment descriptions (Table 1). Most of the studies  
38 listed in Table 1 are likely to have reported overestimates of  
39 replicability as only one asked whether there was sufficient  
40 information to allow replication[10]. In developing summaries for  
41 systematic reviews of back pain, Glenton and colleagues[6] found  
42 sufficient detail "about what the treatment involved" for patients in  
43 only 3 of 24 (13%) treatments, and used 32 other sources to obtain  
44 details for the other 21 treatments. Similarly a review[7] of 29  
45 guideline implementation studies found that the majority lacked  
46 details of how the intervention was carried out, e.g., only 7 (24%)  
47 supplied details of timing. Three other studies simply checked the  
48  
49  
50  
51  
52  
53  
54  
55  
56  
57  
58  
59  
60

1  
2  
3  
4  
5  
6  
7  
8  
9 fourth CONSORT item[3-5]. Similar problems have been identified in  
10 other areas. In a recent survey[15] of 93 publications with novel  
11 questionnaires in JAMA, NEJM, and BMJ, four printed the questionnaire  
12 in the article, three provided online access, but authors failed to  
13 provide questionnaires for 37 of 81 (46%) studies. For some clinical  
14 domains, improving the descriptions of treatments may require  
15 additional work to standardise and document the procedures prior to  
16 clinical trials[16].  
17  
18  
19

20  
21 Similar to many journals, BMJ authors are requested to complete the  
22 CONSORT statement when submitting a paper describing an RCT, but are  
23 not specifically asked to describe their interventions in detail. BMJ  
24 reviewers are not routinely instructed to comment on the replicability  
25 of treatments described in papers, but are instructed to check the  
26 CONSORT statement provided by the author. However, item 4 in the  
27 CONSORT statement appears insufficient to guide authors and reviewers  
28 in all the elements needed, and CONSORT have, so far, added three  
29 intervention extensions (non-pharmacological, herbal, and acupuncture  
30 - [www.consort-statement.org/extensions/](http://www.consort-statement.org/extensions/)), but these overlap, and a  
31 generic checklist with supplementary lists is needed.  
32  
33  
34  
35  
36

37 Medical journals often send papers to reviewers who are practicing  
38 clinicians in the area of interest and some may choose to comment on  
39 the reporting details of the treatment. However, the limitations of  
40 peer review are well documented[17-20]. In our study, peer reviewers  
41 infrequently commented on inadequate reporting of trial details.  
42 Insufficient instructions and guidance to reviewers and lack of  
43 training may compound the problem. However, even when some  
44 limitations were identified by reviewers at the pre-publication stage  
45 they were not always remedied in the published version.  
46  
47  
48  
49  
50  
51  
52  
53  
54  
55  
56  
57  
58  
59  
60

1  
2  
3  
4  
5  
6  
7  
8  
9 The incomplete treatment descriptions we found represent a substantial  
10 waste of the research budget, trial participants' time, and an  
11 opportunity cost for clinicians and patients. Though not surprising,  
12 the lower rates of adequate description of non-drug alternatives is  
13 unfortunate given the rapid growth of the pharmaceuticals budget, and  
14 the potential for non-drug therapies for alternative treatments.  
15 Funders, authors, journals, and research users should all be concerned  
16 with this problem and work together to improve the situation[21].  
17 Journals that want to publish high quality research of use to  
18 practicing health care professionals need to pay attention to adequate  
19 descriptions of treatments. One element of any solution should be a  
20 simple checklist, such as the generic one we have developed, or  
21 specific checklists such as the CONSORT interventions extensions  
22 (<http://www.consort-statement.org/extensions/>). Such checklists may  
23 be useful for authors, peer reviewers, and editors to help ensure that  
24 important details of treatments are provided before the paper is  
25 published and in the public domain. However, the effectiveness of  
26 such checklists needs to be further evaluated. Ideally the full  
27 intervention description should be published with the primary article,  
28 but this often is not feasible, e.g, with manual procedures or  
29 extensive training materials. ~~Finally,~~ ~~§~~Since describing such study  
30 materials could add significantly to the length of papers we suggest  
31 that editors encourage the use of webextras and/or links to study  
32 materials on authors' or funders' institutional websites; these should  
33 be checked for availability at the time of publication, since  
34 researchers may retire, move, or for other reasons not respond after  
35 publication.

Formatted: Normal, Don't adjust space between Latin and Asian text, Don't adjust space between Asian text and numbers

**Acknowledgements**

Formatted: Font: Bold

We thank the BMJ Group for SS's time on this project.

**Contributorship**

SS had full access to all the data in the study and takes responsibility for the integrity of the data and the accuracy of the data analysis. No other staff at the BMJ were involved in the design and conduct of the study; collection, management, analysis, and interpretation of the data; and preparation, review, or approval of the manuscript. SS, PG and CH designed the study; PG and CH rated the manuscripts for replicability; SS analysed the manuscripts' backmatter; SS analysed the data; SS, PG and CH wrote the manuscript.

**Funding**

This research received no specific grant from any funding agency in the public, commercial or not-for-profit sectors.

The University Department of Primary Health Care is part of the NIHR School of Primary Care Research which provides financial support for senior staff who contributed to this paper. The opinions are those of the authors and not of the Department of Health.

**Competing interests**

SS is employed full time by BMJ Group.

**Ethics**

We did not seek ethics committee approval for this study as it mainly involved the evaluation of published manuscripts in the public domain. Only SS had access to named reviewers' and editors' comments but is a full time employee of the BMJ Publishing Group and regularly reads such material as part of her job. On submitting to the BMJ, prospective authors are informed that their paper may be enrolled in a



1  
2  
3  
4  
5  
6  
7  
8  
9 research study as part of improving the peer review process and are  
10 given the opportunity to opt out of this.  
11

### 12 **Data sharing**

13  
14 The checklist responses for each trial alongside an indication of  
15 whether a problem with the description of the intervention was  
16 reported prior to publication are available as a dataset on Dryad:  
17 doi:10.5061/dryad.c1jv0.  
18  
19  
20  
21  
22  
23  
24  
25  
26  
27  
28  
29  
30  
31  
32  
33  
34  
35  
36  
37  
38  
39  
40  
41  
42  
43  
44  
45  
46  
47  
48  
49  
50  
51  
52  
53  
54  
55  
56  
57  
58  
59  
60

## REFERENCES

1. Moher D, Schulz KF, Altman DG, et al. The CONSORT Statement: Revised Recommendations for Improving the Quality of Reports of Parallel-Group Randomized Trials. *Ann Intern Med* 2001;134:657-62.
2. Plint AC, Moher D, Morrison A, et al. Does the CONSORT checklist improve the quality of reports of randomised controlled trials? A systematic review. *Med J Aust* 2006;185(5):263-7.
3. Thabane L, Chu R, Cuddy K, et al. What is the quality of reporting in weight loss intervention studies? A systematic review of randomized controlled trials. *Int J Obes (Lond)* 2007;31(10):1554-9.
4. Kober T, Trelle S, Engert A. Reporting of randomized controlled trials in Hodgkin lymphoma in biomedical journals. *J Natl Cancer Inst* 2006;98(9):620-5.
5. Lai R, Chu R, Fraumeni M, et al. Quality of randomized controlled trials reporting in the primary treatment of brain tumors. *J Clin Oncol* 2006;24(7):1136-44.
6. Glenton C, Underland V, Kho M, et al. Summaries of findings, descriptions of treatments, and information about adverse effects would make reviews more informative. *J Clin Epidemiol* 2006;59(8):770-8. Epub 2006 May 30.
7. Thorsen T & Makela M (eds). Changing Professional Practice Theory and Practice of Clinical Guidelines Implementation. Danish Institute for Health Services Research and Development, 1999. <http://www.dsi.dk>
8. Lasserson DS, Glasziou PP, Perera R, et al. Initiating insulin regimens to achieve intensive glycaemic control for people with type 2 diabetes mellitus. Society for Academic Primary Care Conference, 2006.
9. Jacquier I, Boutron I, Moher D, et al. The Reporting of Randomized Clinical Trials Using a Surgical Intervention Is in Need of

- 1  
2  
3  
4  
5  
6  
7  
8  
9 Immediate Improvement A Systematic Review. *Ann Surg* 2006;244: 677-  
10 83.  
11  
12 10. Glasziou P, Meats E, Heneghan C, et al. What is missing from  
13 descriptions of treatment in trials and reviews? *BMJ* 2008;336:1472-  
14 4.  
15  
16 11. Davidson KW, Goldstein M, Kaplan RM, et al. Evidence-based  
17 behavioral medicine: what is it and how do we achieve it? *Ann*  
18 *Behav Med* 2003;26(3):161-71.  
19  
20 12. Gagnier JJ, Boon H, Rochon P, et al. Reporting Randomized,  
21 Controlled Trials of Herbal Interventions: An Elaborated CONSORT  
22 Statement. *Ann Intern Med* 2006;144:364-7.  
23  
24 13. Dean ME, Morag K, Coulter MK, et al. Reporting Data on Homeopathic  
25 Treatments (RedHot): A Supplement to CONSORT. *Forsch*  
26 *Komplementarmed* 2006;13:368-71.  
27  
28 14. <http://www.cochrane.org/sites/default/files/uploads/glossary.pdf>.  
29 [Accessed 30 July 2012].  
30  
31 15. Schilling LM, Kozak K, Lundahl K, et al. Inaccessible novel  
32 questionnaires in published medical research: hidden methods,  
33 hidden costs. *Am J Epidemiol* 2006;164(12):1141-4. Epub 2006 Oct 13.  
34  
35 16. Pomeroy VM, Cooke E, Hamilton S, et al. Development of a schedule  
36 of current physiotherapy treatment used to improve movement control  
37 and functional use of the lower limb after stroke: a precursor to a  
38 clinical trial. *Neurorehabil Neural Repair* 2005;19(4):350-9.  
39  
40 17. Godlee F, Jefferson T, editors. *Peer review in health sciences*.  
41 London: *BMJ Books*, 1999.  
42  
43 18. Altman DG. The scandal of poor medical research. *BMJ* 1994;308:283-  
44 4.  
45  
46 19. Jefferson T, Alderson P, Wager E, et al. Effects of peer review: A  
47 systematic review. *JAMA* 2002;287:2784-6.  
48  
49  
50  
51  
52  
53  
54  
55  
56  
57  
58  
59  
60

- 1  
2  
3  
4  
5  
6  
7  
8  
9 20. Schroter S, Black N, Evans S, et al. What errors do peer reviewers  
10 detect, and does training improve their ability to detect them? *J*  
11 *R Soc Med* 2008;101:507-14.  
12  
13 21. Glasziou P, Chalmers I, Altman DG, et al. Taking healthcare  
14 interventions from trial to practice. *BMJ* 2010;341:c3852.  
15  
16 22. Phelan M, Blenkinsopp A, Foster NE, et al. Pharmacists-led  
17 medication review for knee pain in older adults: Content, process  
18 and outcomes. *International Journal of Pharmacy Practice* 2008;16:  
19 347-55.  
20  
21  
22  
23  
24  
25  
26  
27  
28  
29  
30  
31  
32  
33  
34  
35  
36  
37  
38  
39  
40  
41  
42  
43  
44  
45  
46  
47  
48  
49  
50  
51  
52  
53  
54  
55  
56  
57  
58  
59  
60

Table 1: Previous studies of adequacy of descriptions of treatments in trials.

| <i>Clinical Issue</i>                                            | <i>Number of Trials</i> | <i>Number (%) Replicable</i> | <i>Methods of deciding replicability</i>                                                                                                                             |
|------------------------------------------------------------------|-------------------------|------------------------------|----------------------------------------------------------------------------------------------------------------------------------------------------------------------|
| Weight loss interventions[3]                                     | 63                      | 62 (98%)                     | Compliance with item 4 of CONSORT statement*                                                                                                                         |
| Treatments of brain tumours[4]                                   | 74                      | 68 (92%)                     | Compliance with item 4 of CONSORT statement*                                                                                                                         |
| Treatments of Hodgkin's lymphoma[5]                              | 241                     | 231 (96%)                    | Compliance with item 4 of CONSORT statement*                                                                                                                         |
| Back pain[6]                                                     | 24                      | 3 (13%)                      | Sufficient information on what happens before, during, and after treatment                                                                                           |
| Implementation of Guidelines[7]                                  | 29                      | < 7 (16%)                    | Assessed 6 elements: flexibility, timing, content, medium, deliverer, receiver. There is not an overall adequacy rating, but none was 100% and only 7/29 gave timing |
| Insulin initiation in Type 2 diabetes[8]                         | 14                      | 3 (21%)                      | Providing both starting dose and titration regime.                                                                                                                   |
| Surgical Procedures intended[9]                                  | 158                     | 138 (87%)                    | Only required that "some" detail was provided, not sufficient for replication; 41% also provided some detail on actual surgery administered.                         |
| Range of topics published in Evidence Based Medicine Journal[10] | 55                      | 36 (65%)                     | Two general practitioners were independently asked whether they could use this treatment with a patient if they saw them tomorrow                                    |

\* Item 4 is: "Precise details of the treatments intended for each group and how and when they were actually administered"

1  
2  
3  
4  
5 **Figure 1: Elements of interventions - percentage clearly described.**  
6  
7

8  
9 Note: Each element is fully described in Box 1.  
10  
11  
12  
13  
14  
15  
16  
17  
18  
19  
20  
21  
22  
23  
24  
25  
26  
27  
28  
29  
30  
31  
32  
33  
34  
35  
36  
37  
38  
39  
40  
41  
42  
43  
44  
45

1  
2  
3  
4  
5 **Figure 2: Papers where editors' or reviewers' identified a problem (pre-publication), and**  
6 **whether it remained at post-publication.**  
7

8  
9  
10  
11 Note: Each element is fully described in Box 1.  
12  
13  
14  
15  
16  
17  
18  
19  
20  
21  
22  
23  
24  
25  
26  
27  
28  
29  
30  
31  
32  
33  
34  
35  
36  
37  
38  
39  
40  
41  
42  
43  
44  
45

**Table 2: Examples of problems identified at pre-publication and not fixed by time of publication.**

| Paper title                                                                                                                                                       | Type of problem identified at pre- and post-publication | Nature of the problem                                                                                             |
|-------------------------------------------------------------------------------------------------------------------------------------------------------------------|---------------------------------------------------------|-------------------------------------------------------------------------------------------------------------------|
| Partner notification of chlamydia infection in primary care: randomised controlled trial and analysis of resource use                                             | Procedure                                               | Not clear exactly what was done and when                                                                          |
| Didgeridoo playing as alternative treatment for obstructive sleep apnoea syndrome: randomised controlled trial                                                    | Intensity                                               | Description of didgeridoo practice times not clear                                                                |
| Treatment of low back pain by acupuncture and physical therapy: randomised controlled trial                                                                       | Procedure                                               | Can't tell how personalised the treatment was - who had what done and when                                        |
| Effect of enhanced psychosocial care on antipsychotic use in nursing home residents with severe dementia: cluster randomised trial                                | Procedure                                               | Complex intervention and what was received and when for both groups is unclear.                                   |
| Effect of patient completed agenda forms and doctors' education about the agenda on the outcome of consultations: randomised controlled trial                     | Recipient                                               | Recipient of intervention unclear                                                                                 |
| Effect of telephone contact on further suicide attempts in patients discharged from an emergency department: randomised controlled study                          | Procedure                                               | More detail needed on the content and duration of the phone calls ie effort involved to enhance compliance        |
| Effective control of dengue vectors with curtains and water container covers treated with insecticide in Mexico and Venezuela: cluster randomised trials          | Procedure                                               | Not clear why all the houses did not get nets and what they actually received                                     |
| Randomised controlled trial of four commercial weight loss programmes in the UK: initial findings from the BBC "diet trials"                                      | Procedure                                               | Not enough detail of the content of the programmes or time involved                                               |
| A randomised controlled trial of management strategies for acute infective conjunctivitis in general practice                                                     | Recipient                                               | Recipients poorly described re conjunctivitis inclusion/exclusion criteria                                        |
| Effectiveness of telephone counselling by a pharmacist in reducing mortality in patients receiving polypharmacy: randomised controlled trial                      | Procedure                                               | Not clear exactly what the pharmacists said or did. It must have been more than just a reminder phonecall.        |
| Telephone administered cognitive behaviour therapy for treatment of obsessive compulsive disorder: randomised controlled non-inferiority trial                    | Procedure                                               | The actual therapy provided is only very briefly described                                                        |
| Mobilisation with movement and exercise, corticosteroid injection, or wait and see for tennis elbow: randomised trial                                             | Procedure                                               | Not clear what the physiotherapy actually involved                                                                |
| Effectiveness of community physiotherapy and enhanced pharmacy review for knee pain in people aged over 55 presenting to primary care: pragmatic randomised trial | Procedure                                               | Not clear what happened and when. Content of pharmacist sessions unclear.<br>NB: Not fully described due to space |



1  
2  
3  
4  
5  
6  
7  
8  
9  
10  
11  
12  
13  
14  
15  
16  
17  
18  
19  
20  
21  
22  
23  
24  
25  
26  
27  
28  
29  
30  
31  
32  
33  
34  
35  
36  
37  
38  
39  
40  
41  
42  
43  
44  
45  
46  
47  
48  
49

For peer review only

|                                                                                                                                                     |           |                                                                                                                |
|-----------------------------------------------------------------------------------------------------------------------------------------------------|-----------|----------------------------------------------------------------------------------------------------------------|
|                                                                                                                                                     |           | limitations. More complete description of the pharmacy intervention subsequently published [22]                |
| Prevention of HIV and sexually transmitted diseases in high risk social networks of young Roma (Gypsy) men in Bulgaria: randomised controlled trial | Procedure | Intervention components versus what controls received not clear - need to know the details of the intervention |

1  
2  
3  
4  
5  
6  
7  
8  
9  
10  
11  
12  
13  
14  
15  
16  
17  
18  
19  
20  
21  
22  
23  
24  
25  
26  
27  
28  
29  
30  
31  
32  
33  
34  
35  
36  
37  
38  
39  
40  
41  
42  
43  
44  
45  
46  
47  
48  
49  
50  
51  
52  
53  
54  
55  
56  
57  
58  
59  
60

**Box 1: Interventions checklist**

|           |                                                                                                                                  |                                                          |
|-----------|----------------------------------------------------------------------------------------------------------------------------------|----------------------------------------------------------|
| Setting   | Is it clear <b>where</b> the intervention was delivered?                                                                         | <input type="checkbox"/> Yes <input type="checkbox"/> No |
| Recipient | Is it clear <b>who is receiving</b> the intervention?                                                                            | <input type="checkbox"/> Yes <input type="checkbox"/> No |
| Provider  | Is it clear <b>who delivered</b> the intervention?                                                                               | <input type="checkbox"/> Yes <input type="checkbox"/> No |
| Procedure | Is the <b>procedure</b> (including the sequencing of the technique) of the intervention sufficiently clear to allow replication? | <input type="checkbox"/> Yes <input type="checkbox"/> No |
| Materials | Are the <b>physical or informational materials</b> used adequately described?                                                    | <input type="checkbox"/> Yes <input type="checkbox"/> No |
| Intensity | Is the <b>dose/duration of individual sessions</b> of the intervention clear?                                                    | <input type="checkbox"/> Yes <input type="checkbox"/> No |
| Schedule  | Is the <b>schedule (interval, frequency, duration, or timing)</b> of the intervention clear?                                     | <input type="checkbox"/> Yes <input type="checkbox"/> No |
| Missing   | Is there anything else <b>missing</b> from the description of the intervention?<br>If yes, what? _____                           | <input type="checkbox"/> Yes <input type="checkbox"/> No |

1  
2  
3  
4  
5  
6  
7  
8  
9  
10  
11  
12  
13  
14  
15  
16  
17  
18  
19  
20  
21  
22  
23  
24  
25  
26  
27  
28  
29  
30  
31  
32  
33  
34  
35  
36  
37  
38  
39  
40  
41  
42  
43  
44  
45  
46  
47  
48  
49  
50  
51  
52  
53  
54  
55  
56  
57  
58  
59  
60

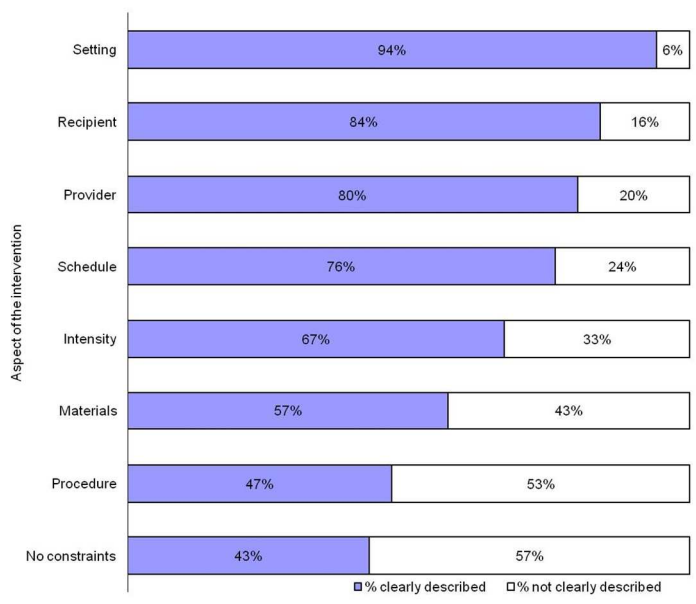

256x156mm (150 x 150 DPI)

Review only

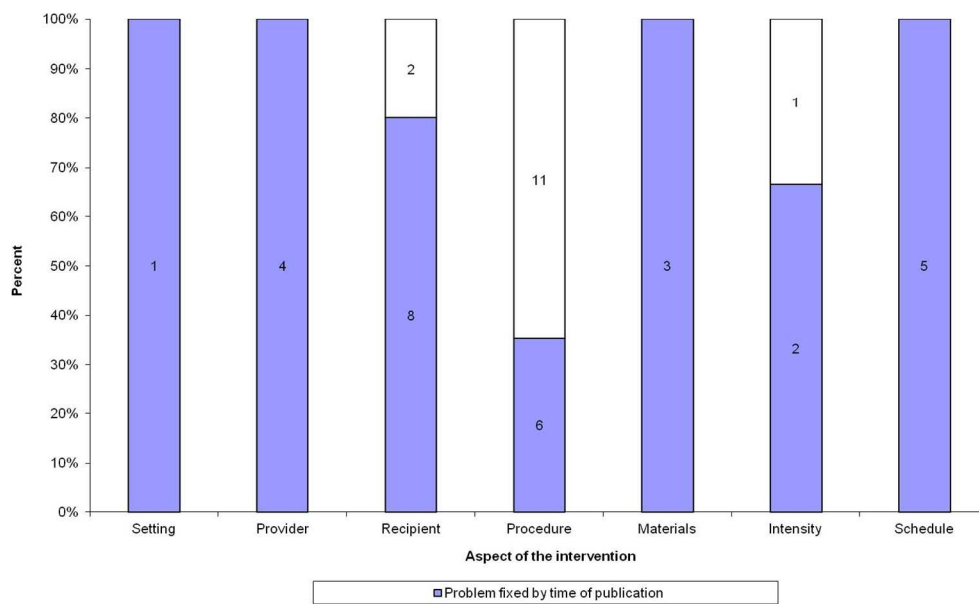

256x156mm (150 x 150 DPI)

Review only

1  
2  
3  
4  
5  
6  
7  
8  
9  
10  
11  
12  
13  
14  
15  
16  
17  
18  
19  
20  
21  
22  
23  
24  
25  
26  
27  
28  
29  
30  
31  
32  
33  
34  
35  
36  
37  
38  
39  
40  
41  
42  
43  
44  
45  
46  
47  
48  
49  
50  
51  
52  
53  
54  
55  
56  
57  
58  
59  
60



**Quality of descriptions of treatments: A review of published randomised controlled trials**

|                                 |                                                                                                                                                              |
|---------------------------------|--------------------------------------------------------------------------------------------------------------------------------------------------------------|
| Journal:                        | <i>BMJ Open</i>                                                                                                                                              |
| Manuscript ID:                  | bmjopen-2012-001978.R2                                                                                                                                       |
| Article Type:                   | Research                                                                                                                                                     |
| Date Submitted by the Author:   | 23-Oct-2012                                                                                                                                                  |
| Complete List of Authors:       | Schroter, Sara; BMJ Editorial, Glasziou, Paul; Oxford University, Department of Primary Care, Heneghan, Carl; Oxford University, Department of Primary Care, |
| <b>Primary Subject Heading</b>: | Medical publishing and peer review                                                                                                                           |
| Secondary Subject Heading:      | Communication, Evidence based practice                                                                                                                       |
| Keywords:                       | GENERAL MEDICINE (see Internal Medicine), Protocols & guidelines < HEALTH SERVICES ADMINISTRATION & MANAGEMENT, JOURNALISM (see Medical Journalism)          |
|                                 |                                                                                                                                                              |

SCHOLARONE™  
Manuscripts

For peer review only

1  
2  
3  
4  
5  
6  
7  
8  
9 **Quality of descriptions of treatments:**

10 **A review of published randomised controlled trials**

11  
12  
13  
14  
15 Sara Schroter (PhD),<sup>1,2</sup> Paul Glasziou (PhD),<sup>2</sup> Carl Heneghan (MRCGP)<sup>2</sup>

- 16  
17  
18  
19  
20  
21 1. BMJ Editorial, BMA House, Tavistock Square, London WC1H 9JR, UK  
22  
23  
24 2. Centre for Evidence Based Medicine, Department of Primary Care,  
25  
26 Oxford University, Old Road Campus, Headington, Oxford, OX3 7LF,  
27  
28 UK  
29  
30  
31  
32  
33

34 **Corresponding author:**

35 Dr Sara Schroter  
36 Senior Researcher  
37 BMJ Editorial  
38 BMA House  
39 Tavistock Square  
40 London WC1H 9JR  
41  
42 Tel: +44 20 7383 6744  
43 Fax: +44 20 7383 6418  
44 Email: [sschroter@bmj.com](mailto:sschroter@bmj.com)  
45

46  
47 | Word count: 2, ~~4652341~~ words  
48  
49  
50  
51  
52  
53  
54  
55  
56  
57  
58  
59  
60

**ABSTRACT**

**Objectives:** To be useable in clinical practice, treatments studied in trials must provide sufficient information to enable clinicians and researchers to replicate. We sought to assess the completeness of treatment descriptions in published randomised controlled trials using a checklist and to determine the extent to which peer reviewers and editors comment on the quality of reporting of treatments.

**Design:** Cross-sectional study.

**Setting:** Trials published in the BMJ, a general medical journal.

**Participants:** 51 trials published in the BMJ were independently evaluated by two raters using the checklist. Reviewers' and editors' comments were also assessed for statements on treatment descriptions.

**Primary and secondary outcome measures:** Proportion of trials rated as replicable (primary outcome).

**Results:** For 57% (29/51) of the papers, published treatment descriptions were not considered sufficient to allow replication. Most poorly described aspects were the actual procedures involved including the sequencing of the technique (what happened and when) and the physical or informational materials used (e.g. training materials): 53% and 43% not clear, respectively. For a third of treatments, the dose/duration of individual sessions was not clear and for a quarter the schedule (interval, frequency, duration, or timing) was not clear. Although the majority of problems were not picked up by reviewers and editors, when they were detected only about two-thirds were fixed before publication.

1  
2  
3  
4  
5  
6  
7  
8  
9  
10  
11  
12  
13  
14  
15  
16  
17  
18  
19  
20  
21  
22  
23  
24  
25  
26  
27  
28  
29  
30  
31  
32  
33  
34  
35  
36  
37  
38  
39  
40  
41  
42  
43  
44  
45  
46  
47  
48  
49  
50  
51  
52  
53  
54  
55  
56  
57  
58  
59  
60

**Conclusions:** Journals wanting to publish research of use to practicing health care professionals need to pay more attention to descriptions of treatments. Our checklist, may be useful for reviewers, and editors and could help ensure important details of treatments are provided before papers are in the public domain.

For peer review only



**ARTICLE SUMMARY****Article focus**

- For clinicians applying treatments, or researchers wishing to replicate or extend research findings, adequate treatment descriptions in publications are vital.
- We document the adequacy of reporting of different elements of descriptions of treatments in RCTs published in the BMJ; we determine the extent to which peer reviewers and editors comment on the adequacy of reporting of treatments, and correct these during the review process; and develop a simple checklist for use by editors and reviewers to enhance the reporting quality of published interventions.

**Key messages**

- The majority of published trials in our study lacked important details describing the treatment. These details would be required for health care professionals to undertake these treatments in practice, and for other researchers to replicate, or build on, the findings in future studies.
- Although the majority of problems were not picked up by peer reviewers and editors, when they were detected only about two-thirds were fixed before publication.
- The incomplete treatment descriptions we found represent a substantial waste of the research budget, trial participants' time, and an opportunity cost for clinicians and patients.

**Strengths and limitations of this study**

- This study systematically assesses the quality of descriptions of interventions in a general medical journal and reports on whether reviewers and editors detect and fix problems with the descriptions of treatments in trials.

- 1  
2  
3  
4  
5  
6  
7  
8  
9 • We included only RCTs in one general medical journal and the  
10 results may not be generalisable to other journals. However, the  
11 BMJ has a lengthy review process and is generally considered to  
12 publish high quality research so it is likely that the situation  
13 is worse for less influential lower impact factor journals with  
14 fewer resources.  
15  
16 • We used two raters who were both academic general practitioners  
17 to assess the manuscripts. However, none of the papers in this  
18 study described treatments that our raters found too specialised  
19 to evaluate so none were excluded.  
20  
21  
22  
23  
24  
25  
26  
27  
28  
29  
30  
31  
32  
33  
34  
35  
36  
37  
38  
39  
40  
41  
42  
43  
44  
45  
46  
47  
48  
49  
50  
51  
52  
53  
54  
55  
56  
57  
58  
59  
60

## INTRODUCTION

Before dissemination, innovations in treatment require two things: (i) valid research that demonstrates the treatment's effectiveness and (ii) a description of the treatment procedure sufficient to allow clinicians and others to apply the treatment in practice. Both elements require adequate reporting. The Consolidated Standards for Reporting Trials (CONSORT) statement on reporting randomised controlled trials (RCTs)[1] was developed to help authors and editors improve the reporting of RCTs and has been widely accepted. It has been influential in improving the quality of reporting trials' methods and results.[2] However, less attention has been given to the second element: the description of the treatment being tested. For clinicians applying treatments, or researchers who wish to replicate or extend the findings, adequate treatment descriptions are vital. Treatments vary considerably in their complexity. At one end of the extreme are simple drug trials with fixed dose drugs requiring only specification of the chemical entity, dose, frequency and duration of treatment. However, even drug treatments can require more detail if treatment requires titration, monitoring, complex delivery systems, or co-treatments. Non-drug treatments require these same elements, but a physical, educational, or psychological procedure - equivalent, of the chemical entity - is often far more complex. At the other extreme are multi-stage surgical procedures that may not be codifiable and require training in the institution that developed the procedure. Between these extremes are educational treatments, physical treatments such as physiotherapy, and psychological treatments.

Two of CONSORT's 22 items are directly relevant to clinicians wishing to apply treatments: the eligibility criteria for participants and the settings and locations where the data were collected (item 3), and precise details of the treatments intended for each group and how and when they were actually administered (item 4). Yet previous work has

1  
2  
3  
4  
5  
6  
7  
8  
9 suggested this may be insufficient to guide an adequate treatment  
10 description.[3-5] Table 1 shows previous studies findings on  
11 inadequate reporting of specific aspects of trial interventions within  
12 a range of treatment areas; for example, an evaluation of trials  
13 complying with item 4 of the CONSORT statement.[3-10]. Some attempts  
14 have been made to develop detailed specifications in some treatment  
15 areas. For example, Davidson et al [11] have outlined the minimal  
16 treatment detail to be described in research reports in behavioural  
17 medicine. In a similar vein, specific reporting checklists are being  
18 developed for some types of treatments such as herbal treatments[12]  
19 and homeopathy [13], which often require additional treatment details.  
20 None of these studies have systematically assessed the quality of  
21 descriptions of a series of interventions in a general medical journal  
22 using a checklist.  
23  
24  
25  
26  
27

28  
29 The purpose of our study was (i) to document the adequacy of reporting  
30 of the different elements of descriptions of treatments in RCTs  
31 published over one year in a large general medical journal (the BMJ);  
32 (ii) to determine the extent to which peer reviewers and editors  
33 comment on the adequacy of reporting of treatments, and correct these  
34 during the review process; and (iii) to develop a simple checklist for  
35 use by editors and reviewers to enhance the reporting quality of  
36 published interventions.  
37  
38  
39  
40  
41  
42  
43  
44  
45  
46  
47  
48  
49  
50  
51  
52  
53  
54  
55  
56  
57  
58  
59  
60

## METHODS

### Setting

We conducted the research in 2007 at the BMJ, a general medical journal, where we had access to all backmatter associated with journal submissions. The BMJ publishes research on a wide range of clinical topics.

### **Development, refining and piloting of the checklist**

Based on the work of Davidson et al[11], the CONSORT statement[1] and our own analysis of poorly reported trials abstracted in the journal Evidence Based Medicine[10], we designed an initial checklist of the minimal details that should be included in a description of a treatment in an RCT. We piloted this on the first 10 papers and then, based on problems identified, revised the checklist. The first 10 papers were then reevaluated with the revised checklist. The revised checklist (Box 1) included the following seven aspects: a description of where the treatment was delivered (setting); who delivered the treatment (provider); who received the treatment (recipient); details of the procedure including the sequencing of the technique (procedure); a description of the physical or informational materials used (materials); the dose/duration of individual sessions of the treatment (intensity); and the scheduling i.e. the interval, frequency, duration, or timing of the treatment (schedule). Raters also completed an additional subjective global item to indicate whether the treatment was sufficiently described for them to replicate it if there were no resource or training constraints (no constraints).

### **Evaluation of published descriptions**

We reviewed the given study design of all research papers published in the BMJ in a single year, 2006, and selected all RCTs for possible inclusion. Papers presenting only follow-up data or longer term

1  
2  
3  
4  
5  
6  
7  
8  
9 outcomes of a previously published trial were subsequently excluded as  
10 details of the intervention may previously have been reported. The  
11 full length version of the published papers was then independently  
12 evaluated by two raters (PG and CH) for the clarity of reporting of  
13 key features of the intervention using our checklist. Our use of the  
14 term intervention refers to "the process of intervening on people,  
15 groups, entities or objects in an experimental study"[14]. We did not  
16 evaluate the clarity of reporting of the treatment received by the  
17 control group. Both raters were blind to comments from editors and  
18 reviewers. Raters then discussed the results in person and  
19 disagreements were resolved through consensus discussion supervised by  
20 SS.  
21  
22  
23  
24  
25

#### 26 **Evaluation of the review process**

27 All back history (reviewers' comments and editors' notes) for the  
28 papers were obtained by SS from the BMJ's electronic manuscript  
29 tracking system. SS collated all statements given on the clarity of  
30 the reporting of the treatment for each manuscript and anonymised the  
31 comments. SS then categorised the deficiencies using our checklist.  
32 PG then assessed whether the specified deficiencies had been addressed  
33 in the final published version.  
34  
35  
36  
37  
38  
39  
40  
41  
42  
43  
44  
45  
46  
47  
48  
49  
50  
51  
52  
53  
54  
55  
56  
57  
58  
59  
60

## RESULTS

We included 51 RCTs published in the BMJ in 2006. These papers described studies with a wide range of settings and treatments. 21 (41%) involved the administration of a drug either alone or in addition to another therapy.

### Replicability

Overall, assuming no resource or training constraints, both raters reported that 57% (29/51) of the treatments could not be replicated based on the description of the treatment as published. Studies of drug treatments were better described than non-drug treatments: 7/21 (33%) of drug treatments were considered non-replicable in comparison with 22/30 (73%) non-drug treatments.

### Type of problems identified in published versions

We identified 99 problems, ranging in seriousness, with the descriptions of the interventions in the published versions. For each checklist item the proportion of trials with adequately described features ranged from 47% to 94% (Figure 1). The most poorly described aspects of the treatment were the actual procedures involved including the sequencing of the technique - what happened and when (53% not clear), and the physical or informational materials used e.g. training materials (43% not clear). Aspects of the treatment better described included a description of where the treatment was delivered (94% clear). For a third of the treatments described, the dose, duration, or both of individual sessions of the treatment were not clear and for around a quarter the schedule (interval, frequency, duration, or timing) of the treatment was not clear.

### Problems identified prior to publication

During the pre-publication phase of the manuscripts, the reviewers, editors and editorial advisors reported 43 problems with the

1  
2  
3  
4  
5  
6  
7  
8  
9 descriptions of the interventions. Most comments focused on the need  
10 for clarification of the sequencing of the technique described  
11 (procedure) and the patient group under study (recipient). Thirty  
12 three percent (14/43) of these problems were not fully fixed by the  
13 time the paper was published (as assessed by our raters) (Figure 2).  
14 Where reviewers and editors identified problems with descriptions of  
15 the setting, the provider, the materials, and the schedule, these were  
16 improved by the time of publication. Problems that were not corrected  
17 largely concerned the descriptions of the procedures of the treatments  
18 i.e. it was not clear what happened and when. Table 2 shows the 14  
19 problems identified at pre-publication which were not sufficiently  
20 remedied in the published version.  
21  
22  
23  
24  
25  
26  
27  
28  
29  
30  
31  
32  
33  
34  
35  
36  
37  
38  
39  
40  
41  
42  
43  
44  
45  
46  
47  
48  
49  
50  
51  
52  
53  
54  
55  
56  
57  
58  
59  
60



## DISCUSSION

The majority of published trials in our study lacked important details describing the treatment. These details would be required for health care professionals to undertake these treatments in practice, or for other researchers to replicate, or build on, the findings in future studies. Many problems were easily rectifiable, such as clearer reporting on the sequencing of techniques, actual doses/durations of treatments and their scheduling. Although the majority of problems were not picked up by peer reviewers and editors, when they were detected only about two-thirds were fixed before publication.

Our findings are consistent with our earlier analysis of 80 RCTs and systematic reviews published in the journal *Evidence Based Medicine* where approximately a half (51%) had an "inadequate" description of the treatment[10]. *Evidence Based Medicine* abstracts journals in a range of specialties and the similarity in results suggests that the results in this study are valid. Unlike, this study, our previous study did not quantitatively document the types of problems with the treatments described but focused on a global assessment of the replicability of the treatment and whether authors could provide the missing details when asked to do so. The current study went further than our earlier study in that it reports the frequency of poor reporting of specific aspects of trial interventions.[10]

Our study has several limitations. Firstly, we included only RCTs from a single year in one general medical journal and the results may not be generalisable to other journals. However, the BMJ has a lengthy review process and is generally considered to publish high quality research so it is likely that the situation is worse for less influential lower impact factor journals with fewer resources. The BMJ strives to publish papers to "help doctors make better decisions" and is very aware of the importance of good scientific reporting of

1  
2  
3  
4  
5  
6  
7  
8  
9 research. As such it may pay more attention to reporting issues than  
10 other journals. We found that the BMJ reported these aspects of  
11 interventions poorly and this suggests that the situation may well be  
12 worse for other journals. Secondly, we evaluated RCTs published in  
13 2006 and it is possible that there have been improvements in  
14 reporting, given the wider use of the internet and web appendices in  
15 recent years. Further research would be needed to test this.  
16 Thirdly, we used only two raters who were both academic general  
17 practitioners to assess the manuscripts some of which could have  
18 described treatments they were not familiar with. However, all RCTs  
19 published in the BMJ describe treatments that should be familiar to  
20 general practitioners, as it targets a general medical readership.  
21 None of the papers in this study described treatments that our raters  
22 found too specialised to evaluate so none were excluded. Our raters  
23 were also experienced academics interested in improving the reporting  
24 quality of trials and as such the results may represent the best case  
25 scenario. Finally, we did not try to separately assess planned versus  
26 actual treatment, which may sometimes differ substantially and require  
27 specific description[21].  
28  
29  
30  
31  
32  
33  
34  
35

36 We identified a few other previous studies which have examined the  
37 adequacy of treatment descriptions (Table 1). Most of the studies  
38 listed in Table 1 are likely to have reported overestimates of  
39 replicability as only one asked whether there was sufficient  
40 information to allow replication[10]. In developing summaries for  
41 systematic reviews of back pain, Glenton and colleagues[6] found  
42 sufficient detail "about what the treatment involved" for patients in  
43 only 3 of 24 (13%) treatments, and used 32 other sources to obtain  
44 details for the other 21 treatments. Similarly a review[7] of 29  
45 guideline implementation studies found that the majority lacked  
46 details of how the intervention was carried out, e.g., only 7 (24%)  
47 supplied details of timing. Three other studies simply checked the  
48  
49  
50  
51  
52  
53  
54  
55  
56  
57  
58  
59  
60

1  
2  
3  
4  
5  
6  
7  
8  
9 fourth CONSORT item[3-5]. Similar problems have been identified in  
10 other areas. In a recent survey[15] of 93 publications with novel  
11 questionnaires in JAMA, NEJM, and BMJ, four printed the questionnaire  
12 in the article, three provided online access, but authors failed to  
13 provide questionnaires for 37 of 81 (46%) studies. For some clinical  
14 domains, improving the descriptions of treatments may require  
15 additional work to standardise and document the procedures prior to  
16 clinical trials[16].  
17  
18  
19

20  
21 Similar to many journals, BMJ authors are requested to complete the  
22 CONSORT statement when submitting a paper describing an RCT, but are  
23 not specifically asked to describe their interventions in detail. BMJ  
24 reviewers are not routinely instructed to comment on the replicability  
25 of treatments described in papers, but are instructed to check the  
26 CONSORT statement provided by the author. However, item 4 in the  
27 CONSORT statement appears insufficient to guide authors and reviewers  
28 in all the elements needed, and CONSORT have, so far, added three  
29 intervention extensions (non-pharmacological, herbal, and acupuncture  
30 - [www.consort-statement.org/extensions/](http://www.consort-statement.org/extensions/)), but these overlap, and a  
31 generic checklist with supplementary lists is needed-.  
32  
33  
34  
35  
36

37 Medical journals often send papers to reviewers who are practicing  
38 clinicians in the area of interest and some may choose to comment on  
39 the reporting details of the treatment. However, the limitations of  
40 peer review are well documented[17-20]. In our study, peer reviewers  
41 infrequently commented on inadequate reporting of trial details.  
42 Insufficient instructions and guidance to reviewers and lack of  
43 training may compound the problem. However, even when some  
44 limitations were identified by reviewers at the pre-publication stage  
45 they were not always remedied in the published version.  
46  
47  
48  
49  
50  
51  
52  
53  
54  
55  
56  
57  
58  
59  
60

1  
2  
3  
4  
5  
6  
7  
8  
9 The incomplete treatment descriptions we found represent a substantial  
10 waste of the research budget, trial participants' time, and an  
11 opportunity cost for clinicians and patients. Though not surprising,  
12 the lower rates of adequate description of non-drug alternatives is  
13 unfortunate given the rapid growth of the pharmaceuticals budget, and  
14 the potential for non-drug therapies for alternative treatments.  
15 Funders, authors, journals, and research users should all be concerned  
16 with this problem and work together to improve the situation[21].  
17 Journals that want to publish high quality research of use to  
18 practicing health care professionals need to pay attention to adequate  
19 descriptions of treatments. One element of any solution should be a  
20 simple checklist, such as the generic one we have developed, or  
21 specific checklists such as the CONSORT interventions extensions  
22 (<http://www.consort-statement.org/extensions/>). Such checklists may  
23 be useful for authors, peer reviewers, and editors to help ensure that  
24 important details of treatments are provided before the paper is  
25 published and in the public domain. However, the effectiveness of  
26 such checklists needs to be further evaluated. Ideally the full  
27 intervention description should be published with the primary article,  
28 but this often is not feasible, e.g, with manual procedures or  
29 extensive training materials. ~~Finally,~~ ~~§~~Since describing such study  
30 materials could add significantly to the length of papers we suggest  
31 that editors encourage the use of webextras and/or links to study  
32 materials on authors' or funders' institutional websites; these should  
33 be checked for availability at the time of publication, since  
34 researchers may retire, move, or for other reasons not respond after  
35 publication.

Formatted: Normal, Don't adjust space between Latin and Asian text, Don't adjust space between Asian text and numbers

**Acknowledgements**

Formatted: Font: Bold

We thank the BMJ Group for SS's time on this project.

**Contributorship**

SS had full access to all the data in the study and takes responsibility for the integrity of the data and the accuracy of the data analysis. No other staff at the BMJ were involved in the design and conduct of the study; collection, management, analysis, and interpretation of the data; and preparation, review, or approval of the manuscript. SS, PG and CH designed the study; PG and CH rated the manuscripts for replicability; SS analysed the manuscripts' backmatter; SS analysed the data; SS, PG and CH wrote the manuscript.

**Funding**

This research received no specific grant from any funding agency in the public, commercial or not-for-profit sectors.

The University Department of Primary Health Care is part of the NIHR School of Primary Care Research which provides financial support for senior staff who contributed to this paper. The opinions are those of the authors and not of the Department of Health.

**Competing interests**

SS is employed full time by BMJ Group.

**Ethics**

We did not seek ethics committee approval for this study as it mainly involved the evaluation of published manuscripts in the public domain. Only SS had access to named reviewers' and editors' comments but is a full time employee of the BMJ Publishing Group and regularly reads such material as part of her job. On submitting to the BMJ, prospective authors are informed that their paper may be enrolled in a

1  
2  
3  
4  
5  
6  
7  
8  
9  
10  
11  
12  
13  
14  
15  
16  
17  
18  
19  
20  
21  
22  
23  
24  
25  
26  
27  
28  
29  
30  
31  
32  
33  
34  
35  
36  
37  
38  
39  
40  
41  
42  
43  
44  
45  
46  
47  
48  
49  
50  
51  
52  
53  
54  
55  
56  
57  
58  
59  
60

research study as part of improving the peer review process and are given the opportunity to opt out of this.

**Data sharing**

The checklist responses for each trial alongside an indication of whether a problem with the description of the intervention was reported prior to publication are available as a dataset on Dryad: doi:10.5061/dryad.c1jv0.

For peer review only

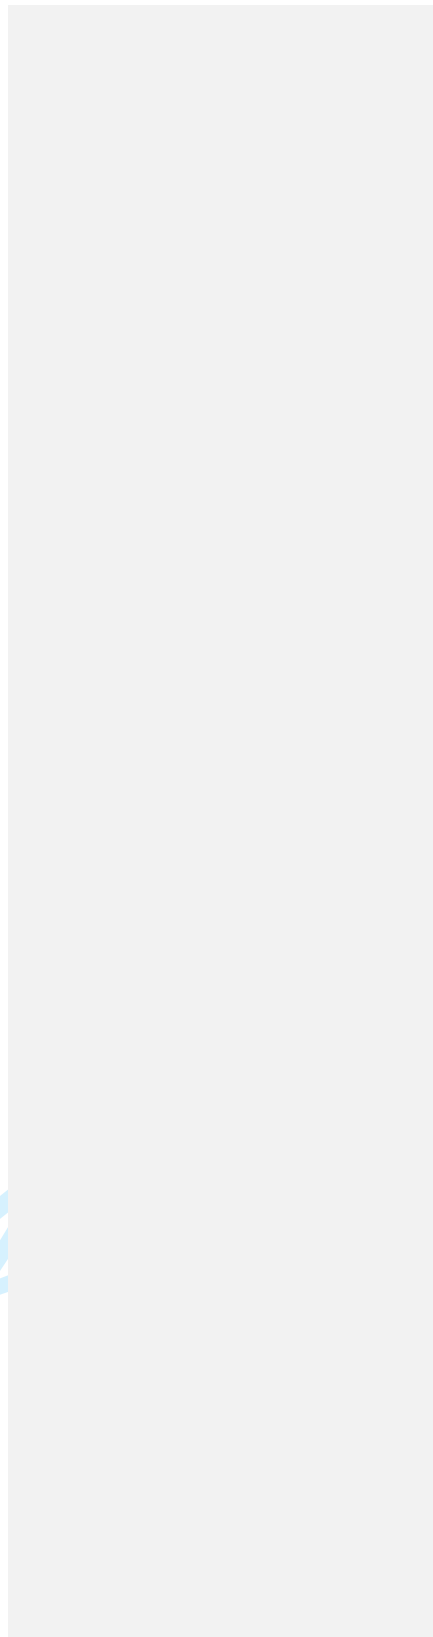

## REFERENCES

1. Moher D, Schulz KF, Altman DG, et al. The CONSORT Statement: Revised Recommendations for Improving the Quality of Reports of Parallel-Group Randomized Trials. *Ann Intern Med* 2001;134:657-62.
2. Plint AC, Moher D, Morrison A, et al. Does the CONSORT checklist improve the quality of reports of randomised controlled trials? A systematic review. *Med J Aust* 2006;185(5):263-7.
3. Thabane L, Chu R, Cuddy K, et al. What is the quality of reporting in weight loss intervention studies? A systematic review of randomized controlled trials. *Int J Obes (Lond)* 2007;31(10):1554-9.
4. Kober T, Trelle S, Engert A. Reporting of randomized controlled trials in Hodgkin lymphoma in biomedical journals. *J Natl Cancer Inst* 2006;98(9):620-5.
5. Lai R, Chu R, Fraumeni M, et al. Quality of randomized controlled trials reporting in the primary treatment of brain tumors. *J Clin Oncol* 2006;24(7):1136-44.
6. Glenton C, Underland V, Kho M, et al. Summaries of findings, descriptions of treatments, and information about adverse effects would make reviews more informative. *J Clin Epidemiol* 2006;59(8):770-8. Epub 2006 May 30.
7. Thorsen T & Makela M (eds). Changing Professional Practice Theory and Practice of Clinical Guidelines Implementation. Danish Institute for Health Services Research and Development, 1999. <http://www.dsi.dk>
8. Lasserson DS, Glasziou PP, Perera R, et al. Initiating insulin regimens to achieve intensive glycaemic control for people with type 2 diabetes mellitus. Society for Academic Primary Care Conference, 2006.
9. Jacquier I, Boutron I, Moher D, et al. The Reporting of Randomized Clinical Trials Using a Surgical Intervention Is in Need of

- 1  
2  
3  
4  
5  
6  
7  
8  
9 Immediate Improvement A Systematic Review. *Ann Surg* 2006;244: 677-  
10 83.  
11  
12 10. Glasziou P, Meats E, Heneghan C, et al. What is missing from  
13 descriptions of treatment in trials and reviews? *BMJ* 2008;336:1472-  
14 4.  
15  
16 11. Davidson KW, Goldstein M, Kaplan RM, et al. Evidence-based  
17 behavioral medicine: what is it and how do we achieve it? *Ann*  
18 *Behav Med* 2003;26(3):161-71.  
19  
20 12. Gagnier JJ, Boon H, Rochon P, et al. Reporting Randomized,  
21 Controlled Trials of Herbal Interventions: An Elaborated CONSORT  
22 Statement. *Ann Intern Med* 2006;144:364-7.  
23  
24 13. Dean ME, Morag K, Coulter MK, et al. Reporting Data on Homeopathic  
25 Treatments (RedHot): A Supplement to CONSORT. *Forsch*  
26 *Komplementarmed* 2006;13:368-71.  
27  
28 14. <http://www.cochrane.org/sites/default/files/uploads/glossary.pdf>.  
29 [Accessed 30 July 2012].  
30  
31 15. Schilling LM, Kozak K, Lundahl K, et al. Inaccessible novel  
32 questionnaires in published medical research: hidden methods,  
33 hidden costs. *Am J Epidemiol* 2006;164(12):1141-4. Epub 2006 Oct 13.  
34  
35 16. Pomeroy VM, Cooke E, Hamilton S, et al. Development of a schedule  
36 of current physiotherapy treatment used to improve movement control  
37 and functional use of the lower limb after stroke: a precursor to a  
38 clinical trial. *Neurorehabil Neural Repair* 2005;19(4):350-9.  
39  
40 17. Godlee F, Jefferson T, editors. *Peer review in health sciences*.  
41 London: *BMJ Books*, 1999.  
42  
43 18. Altman DG. The scandal of poor medical research. *BMJ* 1994;308:283-  
44 4.  
45  
46 19. Jefferson T, Alderson P, Wager E, et al. Effects of peer review: A  
47 systematic review. *JAMA* 2002;287:2784-6.  
48  
49  
50  
51  
52  
53  
54  
55  
56  
57  
58  
59  
60



- 1  
2  
3  
4  
5  
6  
7  
8  
9 20. Schroter S, Black N, Evans S, et al. What errors do peer reviewers  
10 detect, and does training improve their ability to detect them? *J*  
11 *R Soc Med* 2008;101:507-14.  
12  
13 21. Glasziou P, Chalmers I, Altman DG, et al. Taking healthcare  
14 interventions from trial to practice. *BMJ* 2010;341:c3852.  
15  
16 22. Phelan M, Blenkinsopp A, Foster NE, et al. Pharmacists-led  
17 medication review for knee pain in older adults: Content, process  
18 and outcomes. *International Journal of Pharmacy Practice* 2008;16:  
19 347-55.  
20  
21  
22  
23  
24  
25  
26  
27  
28  
29  
30  
31  
32  
33  
34  
35  
36  
37  
38  
39  
40  
41  
42  
43  
44  
45  
46  
47  
48  
49  
50  
51  
52  
53  
54  
55  
56  
57  
58  
59  
60

Table 1: Previous studies of adequacy of descriptions of treatments in trials.

| <i>Clinical Issue</i>                                            | <i>Number of Trials</i> | <i>Number (%) Replicable</i> | <i>Methods of deciding replicability</i>                                                                                                                             |
|------------------------------------------------------------------|-------------------------|------------------------------|----------------------------------------------------------------------------------------------------------------------------------------------------------------------|
| Weight loss interventions[3]                                     | 63                      | 62 (98%)                     | Compliance with item 4 of CONSORT statement*                                                                                                                         |
| Treatments of brain tumours[4]                                   | 74                      | 68 (92%)                     | Compliance with item 4 of CONSORT statement*                                                                                                                         |
| Treatments of Hodgkin's lymphoma[5]                              | 241                     | 231 (96%)                    | Compliance with item 4 of CONSORT statement*                                                                                                                         |
| Back pain[6]                                                     | 24                      | 3 (13%)                      | Sufficient information on what happens before, during, and after treatment                                                                                           |
| Implementation of Guidelines[7]                                  | 29                      | < 7 (16%)                    | Assessed 6 elements: flexibility, timing, content, medium, deliverer, receiver. There is not an overall adequacy rating, but none was 100% and only 7/29 gave timing |
| Insulin initiation in Type 2 diabetes[8]                         | 14                      | 3 (21%)                      | Providing both starting dose and titration regime.                                                                                                                   |
| Surgical Procedures intended[9]                                  | 158                     | 138 (87%)                    | Only required that "some" detail was provided, not sufficient for replication; 41% also provided some detail on actual surgery administered.                         |
| Range of topics published in Evidence Based Medicine Journal[10] | 55                      | 36 (65%)                     | Two general practitioners were independently asked whether they could use this treatment with a patient if they saw them tomorrow                                    |

\* Item 4 is: "Precise details of the treatments intended for each group and how and when they were actually administered"

1  
2  
3  
4  
5 **Figure 1: Elements of interventions - percentage clearly described.**  
6  
7

8  
9 Note: Each element is fully described in Box 1.  
10  
11  
12  
13  
14  
15  
16  
17  
18  
19  
20  
21  
22  
23  
24  
25  
26  
27  
28  
29  
30  
31  
32  
33  
34  
35  
36  
37  
38  
39  
40  
41  
42  
43  
44  
45  
46  
47  
48  
49

1  
2  
3  
4  
5 **Figure 2: Papers where editors' or reviewers' identified a problem (pre-publication), and**  
6 **whether it remained at post-publication.**  
7

8  
9  
10  
11 Note: Each element is fully described in Box 1.  
12  
13  
14  
15  
16  
17  
18  
19  
20  
21  
22  
23  
24  
25  
26  
27  
28  
29  
30  
31  
32  
33  
34  
35  
36  
37  
38  
39  
40  
41  
42  
43  
44  
45  
46  
47  
48  
49

Table 2: Examples of problems identified at pre-publication and not fixed by time of publication.

| Paper title                                                                                                                                                       | Type of problem identified at pre- and post-publication | Nature of the problem                                                                                             |
|-------------------------------------------------------------------------------------------------------------------------------------------------------------------|---------------------------------------------------------|-------------------------------------------------------------------------------------------------------------------|
| Partner notification of chlamydia infection in primary care: randomised controlled trial and analysis of resource use                                             | Procedure                                               | Not clear exactly what was done and when                                                                          |
| Didgeridoo playing as alternative treatment for obstructive sleep apnoea syndrome: randomised controlled trial                                                    | Intensity                                               | Description of didgeridoo practice times not clear                                                                |
| Treatment of low back pain by acupuncture and physical therapy: randomised controlled trial                                                                       | Procedure                                               | Can't tell how personalised the treatment was - who had what done and when                                        |
| Effect of enhanced psychosocial care on antipsychotic use in nursing home residents with severe dementia: cluster randomised trial                                | Procedure                                               | Complex intervention and what was received and when for both groups is unclear.                                   |
| Effect of patient completed agenda forms and doctors' education about the agenda on the outcome of consultations: randomised controlled trial                     | Recipient                                               | Recipient of intervention unclear                                                                                 |
| Effect of telephone contact on further suicide attempts in patients discharged from an emergency department: randomised controlled study                          | Procedure                                               | More detail needed on the content and duration of the phone calls ie effort involved to enhance compliance        |
| Effective control of dengue vectors with curtains and water container covers treated with insecticide in Mexico and Venezuela: cluster randomised trials          | Procedure                                               | Not clear why all the houses did not get nets and what they actually received                                     |
| Randomised controlled trial of four commercial weight loss programmes in the UK: initial findings from the BBC "diet trials"                                      | Procedure                                               | Not enough detail of the content of the programmes or time involved                                               |
| A randomised controlled trial of management strategies for acute infective conjunctivitis in general practice                                                     | Recipient                                               | Recipients poorly described re conjunctivitis inclusion/exclusion criteria                                        |
| Effectiveness of telephone counselling by a pharmacist in reducing mortality in patients receiving polypharmacy: randomised controlled trial                      | Procedure                                               | Not clear exactly what the pharmacists said or did. It must have been more than just a reminder phonecall.        |
| Telephone administered cognitive behaviour therapy for treatment of obsessive compulsive disorder: randomised controlled non-inferiority trial                    | Procedure                                               | The actual therapy provided is only very briefly described                                                        |
| Mobilisation with movement and exercise, corticosteroid injection, or wait and see for tennis elbow: randomised trial                                             | Procedure                                               | Not clear what the physiotherapy actually involved                                                                |
| Effectiveness of community physiotherapy and enhanced pharmacy review for knee pain in people aged over 55 presenting to primary care: pragmatic randomised trial | Procedure                                               | Not clear what happened and when. Content of pharmacist sessions unclear.<br>NB: Not fully described due to space |

1  
2  
3  
4  
5  
6  
7  
8  
9  
10  
11  
12  
13  
14  
15  
16  
17  
18  
19  
20  
21  
22  
23  
24  
25  
26  
27  
28  
29  
30  
31  
32  
33  
34  
35  
36  
37  
38  
39  
40  
41  
42  
43  
44  
45  
46  
47  
48  
49

For peer review only

|                                                                                                                                                     |           |                                                                                                                |
|-----------------------------------------------------------------------------------------------------------------------------------------------------|-----------|----------------------------------------------------------------------------------------------------------------|
|                                                                                                                                                     |           | limitations. More complete description of the pharmacy intervention subsequently published [22]                |
| Prevention of HIV and sexually transmitted diseases in high risk social networks of young Roma (Gypsy) men in Bulgaria: randomised controlled trial | Procedure | Intervention components versus what controls received not clear - need to know the details of the intervention |

1  
2  
3  
4  
5  
6  
7  
8  
9  
10  
11  
12  
13  
14  
15  
16  
17  
18  
19  
20  
21  
22  
23  
24  
25  
26  
27  
28  
29  
30  
31  
32  
33  
34  
35  
36  
37  
38  
39  
40  
41  
42  
43  
44  
45  
46  
47  
48  
49  
50  
51  
52  
53  
54  
55  
56  
57  
58  
59  
60

**Box 1: Interventions checklist**

|           |                                                                                                                                  |                                                          |
|-----------|----------------------------------------------------------------------------------------------------------------------------------|----------------------------------------------------------|
| Setting   | Is it clear <b>where</b> the intervention was delivered?                                                                         | <input type="checkbox"/> Yes <input type="checkbox"/> No |
| Recipient | Is it clear <b>who is receiving</b> the intervention?                                                                            | <input type="checkbox"/> Yes <input type="checkbox"/> No |
| Provider  | Is it clear <b>who delivered</b> the intervention?                                                                               | <input type="checkbox"/> Yes <input type="checkbox"/> No |
| Procedure | Is the <b>procedure</b> (including the sequencing of the technique) of the intervention sufficiently clear to allow replication? | <input type="checkbox"/> Yes <input type="checkbox"/> No |
| Materials | Are the <b>physical or informational materials</b> used adequately described?                                                    | <input type="checkbox"/> Yes <input type="checkbox"/> No |
| Intensity | Is the <b>dose/duration of individual sessions</b> of the intervention clear?                                                    | <input type="checkbox"/> Yes <input type="checkbox"/> No |
| Schedule  | Is the <b>schedule (interval, frequency, duration, or timing)</b> of the intervention clear?                                     | <input type="checkbox"/> Yes <input type="checkbox"/> No |
| Missing   | Is there anything else <b>missing</b> from the description of the intervention?<br>If yes, what? _____                           | <input type="checkbox"/> Yes <input type="checkbox"/> No |

1  
2  
3  
4  
5  
6  
7  
8  
9  
10  
11  
12  
13  
14  
15  
16  
17  
18  
19  
20  
21  
22  
23  
24  
25  
26  
27  
28  
29  
30  
31  
32  
33  
34  
35  
36  
37  
38  
39  
40  
41  
42  
43  
44  
45  
46  
47  
48  
49  
50  
51  
52  
53  
54  
55  
56  
57  
58  
59  
60



256x156mm (150 x 150 DPI)

Review only





256x156mm (150 x 150 DPI)

Review only

1  
2  
3  
4  
5  
6  
7  
8  
9  
10  
11  
12  
13  
14  
15  
16  
17  
18  
19  
20  
21  
22  
23  
24  
25  
26  
27  
28  
29  
30  
31  
32  
33  
34  
35  
36  
37  
38  
39  
40  
41  
42  
43  
44  
45  
46  
47  
48  
49  
50  
51  
52  
53  
54  
55  
56  
57  
58  
59  
60



**ABSTRACT**

**Objectives:** To be useable in clinical practice, treatments studied in trials must provide sufficient information to enable clinicians and researchers to replicate. We sought to assess the completeness of treatment descriptions in published randomised controlled trials using a checklist and to determine the extent to which peer reviewers and editors comment on the quality of reporting of treatments.

**Design:** Cross-sectional study.

**Setting:** Trials published in the BMJ, a general medical journal.

**Participants:** 51 trials published in the BMJ were independently evaluated by two raters using the checklist. Reviewers' and editors' comments were also assessed for statements on treatment descriptions.

**Primary and secondary outcome measures:** Proportion of trials rated as replicable (primary outcome).

**Results:** For 57% (29/51) of the papers, published treatment descriptions were not considered sufficient to allow replication. Most poorly described aspects were the actual procedures involved including the sequencing of the technique (what happened and when) and the physical or informational materials used (e.g. training materials): 53% and 43% not clear, respectively. For a third of treatments, the dose/duration of individual sessions was not clear and for a quarter the schedule (interval, frequency, duration, or timing) was not clear. Although the majority of problems were not picked up by reviewers and editors, when they were detected only about two-thirds were fixed before publication.

1  
2  
3  
4  
5  
6  
7  
8  
9  
10  
11  
12  
13  
14  
15  
16  
17  
18  
19  
20  
21  
22  
23  
24  
25  
26  
27  
28  
29  
30  
31  
32  
33  
34  
35  
36  
37  
38  
39  
40  
41  
42  
43  
44  
45  
46  
47  
48  
49  
50  
51  
52  
53  
54  
55  
56  
57  
58  
59  
60

**Conclusions:** Journals wanting to publish research of use to practicing health care professionals need to pay more attention to descriptions of treatments. Our checklist, may be useful for reviewers, and editors and could help ensure important details of treatments are provided before papers are in the public domain.

For peer review only

**ARTICLE SUMMARY****Article focus**

- For clinicians applying treatments, or researchers wishing to replicate or extend research findings, adequate treatment descriptions in publications are vital.
- We document the adequacy of reporting of different elements of descriptions of treatments in RCTs published in the BMJ; we determine the extent to which peer reviewers and editors comment on the adequacy of reporting of treatments, and correct these during the review process; and develop a simple checklist for use by editors and reviewers to enhance the reporting quality of published interventions.

**Key messages**

- The majority of published trials in our study lacked important details describing the treatment. These details would be required for health care professionals to undertake these treatments in practice, and for other researchers to replicate, or build on, the findings in future studies.
- Although the majority of problems were not picked up by peer reviewers and editors, when they were detected only about two-thirds were fixed before publication.
- The incomplete treatment descriptions we found represent a substantial waste of the research budget, trial participants' time, and an opportunity cost for clinicians and patients.

**Strengths and limitations of this study**

- This study systematically assesses the quality of descriptions of interventions in a general medical journal and reports on whether reviewers and editors detect and fix problems with the descriptions of treatments in trials.

- 1  
2  
3  
4  
5  
6  
7  
8  
9 • We included only RCTs in one general medical journal and the  
10 results may not be generalisable to other journals. However, the  
11 BMJ has a lengthy review process and is generally considered to  
12 publish high quality research so it is likely that the situation  
13 is worse for less influential lower impact factor journals with  
14 fewer resources.  
15  
16 • We used two raters who were both academic general practitioners  
17 to assess the manuscripts. However, none of the papers in this  
18 study described treatments that our raters found too specialised  
19 to evaluate so none were excluded.  
20  
21  
22  
23  
24  
25  
26  
27  
28  
29  
30  
31  
32  
33  
34  
35  
36  
37  
38  
39  
40  
41  
42  
43  
44  
45  
46  
47  
48  
49  
50  
51  
52  
53  
54  
55  
56  
57  
58  
59  
60

## INTRODUCTION

Before dissemination, innovations in treatment require two things: (i) valid research that demonstrates the treatment's effectiveness and (ii) a description of the treatment procedure sufficient to allow clinicians and others to apply the treatment in practice. Both elements require adequate reporting. The Consolidated Standards for Reporting Trials (CONSORT) statement on reporting randomised controlled trials (RCTs)[1] was developed to help authors and editors improve the reporting of RCTs and has been widely accepted. It has been influential in improving the quality of reporting trials' methods and results.[2] However, less attention has been given to the second element: the description of the treatment being tested. For clinicians applying treatments, or researchers who wish to replicate or extend the findings, adequate treatment descriptions are vital. Treatments vary considerably in their complexity. At one end of the extreme are simple drug trials with fixed dose drugs requiring only specification of the chemical entity, dose, frequency and duration of treatment. However, even drug treatments can require more detail if treatment requires titration, monitoring, complex delivery systems, or co-treatments. Non-drug treatments require these same elements, but a physical, educational, or psychological procedure - equivalent, of the chemical entity - is often far more complex. At the other extreme are multi-stage surgical procedures that may not be codifiable and require training in the institution that developed the procedure. Between these extremes are educational treatments, physical treatments such as physiotherapy, and psychological treatments.

Two of CONSORT's 22 items are directly relevant to clinicians wishing to apply treatments: the eligibility criteria for participants and the settings and locations where the data were collected (item 3), and precise details of the treatments intended for each group and how and when they were actually administered (item 4). Yet previous work has

1  
2  
3  
4  
5  
6  
7  
8  
9 suggested this may be insufficient to guide an adequate treatment  
10 description.[3-5] Table 1 shows previous studies findings on  
11 inadequate reporting of specific aspects of trial interventions within  
12 a range of treatment areas; for example, an evaluation of trials  
13 complying with item 4 of the CONSORT statement.[3-10]. Some attempts  
14 have been made to develop detailed specifications in some treatment  
15 areas. For example, Davidson et al [11] have outlined the minimal  
16 treatment detail to be described in research reports in behavioural  
17 medicine. In a similar vein, specific reporting checklists are being  
18 developed for some types of treatments such as herbal treatments[12]  
19 and homeopathy [13], which often require additional treatment details.  
20 None of these studies have systematically assessed the quality of  
21 descriptions of a series of interventions in a general medical journal  
22 using a checklist.  
23  
24  
25  
26  
27

28  
29 The purpose of our study was (i) to document the adequacy of reporting  
30 of the different elements of descriptions of treatments in RCTs  
31 published over one year in a large general medical journal (the BMJ);  
32 (ii) to determine the extent to which peer reviewers and editors  
33 comment on the adequacy of reporting of treatments, and correct these  
34 during the review process; and (iii) to develop a simple checklist for  
35 use by editors and reviewers to enhance the reporting quality of  
36 published interventions.  
37  
38  
39  
40  
41  
42  
43  
44  
45  
46  
47  
48  
49  
50  
51  
52  
53  
54  
55  
56  
57  
58  
59  
60



## METHODS

### Setting

We conducted the research in 2007 at the BMJ, a general medical journal, where we had access to all backmatter associated with journal submissions. The BMJ publishes research on a wide range of clinical topics.

### **Development, refining and piloting of the checklist**

Based on the work of Davidson et al[11], the CONSORT statement[1] and our own analysis of poorly reported trials abstracted in the journal Evidence Based Medicine[10], we designed an initial checklist of the minimal details that should be included in a description of a treatment in an RCT. We piloted this on the first 10 papers and then, based on problems identified, revised the checklist. The first 10 papers were then reevaluated with the revised checklist. The revised checklist (Box 1) included the following seven aspects: a description of where the treatment was delivered (setting); who delivered the treatment (provider); who received the treatment (recipient); details of the procedure including the sequencing of the technique (procedure); a description of the physical or informational materials used (materials); the dose/duration of individual sessions of the treatment (intensity); and the scheduling i.e. the interval, frequency, duration, or timing of the treatment (schedule). Raters also completed an additional subjective global item to indicate whether the treatment was sufficiently described for them to replicate it if there were no resource or training constraints (no constraints).

### **Evaluation of published descriptions**

We reviewed the given study design of all research papers published in the BMJ in a single year, 2006, and selected all RCTs for possible inclusion. Papers presenting only follow-up data or longer term

1  
2  
3  
4  
5  
6  
7  
8  
9 outcomes of a previously published trial were subsequently excluded as  
10 details of the intervention may previously have been reported. The  
11 full length version of the published papers was then independently  
12 evaluated by two raters (PG and CH) for the clarity of reporting of  
13 key features of the intervention using our checklist. Our use of the  
14 term intervention refers to "the process of intervening on people,  
15 groups, entities or objects in an experimental study"[14]. We did not  
16 evaluate the clarity of reporting of the treatment received by the  
17 control group. Both raters were blind to comments from editors and  
18 reviewers. Raters then discussed the results in person and  
19 disagreements were resolved through consensus discussion supervised by  
20 SS.  
21  
22  
23  
24

#### 25 26 **Evaluation of the review process**

27 All back history (reviewers' comments and editors' notes) for the  
28 papers were obtained by SS from the BMJ's electronic manuscript  
29 tracking system. SS collated all statements given on the clarity of  
30 the reporting of the treatment for each manuscript and anonymised the  
31 comments. SS then categorised the deficiencies using our checklist.  
32 PG then assessed whether the specified deficiencies had been addressed  
33 in the final published version.  
34  
35  
36  
37  
38  
39  
40  
41  
42  
43  
44  
45  
46  
47  
48  
49  
50  
51  
52  
53  
54  
55  
56  
57  
58  
59  
60

## RESULTS

We included 51 RCTs published in the BMJ in 2006. These papers described studies with a wide range of settings and treatments. 21 (41%) involved the administration of a drug either alone or in addition to another therapy.

### Replicability

Overall, assuming no resource or training constraints, both raters reported that 57% (29/51) of the treatments could not be replicated based on the description of the treatment as published. Studies of drug treatments were better described than non-drug treatments: 7/21 (33%) of drug treatments were considered non-replicable in comparison with 22/30 (73%) non-drug treatments.

### Type of problems identified in published versions

We identified 99 problems, ranging in seriousness, with the descriptions of the interventions in the published versions. For each checklist item the proportion of trials with adequately described features ranged from 47% to 94% (Figure 1). The most poorly described aspects of the treatment were the actual procedures involved including the sequencing of the technique - what happened and when (53% not clear), and the physical or informational materials used e.g. training materials (43% not clear). Aspects of the treatment better described included a description of where the treatment was delivered (94% clear). For a third of the treatments described, the dose, duration, or both of individual sessions of the treatment were not clear and for around a quarter the schedule (interval, frequency, duration, or timing) of the treatment was not clear.

### Problems identified prior to publication

During the pre-publication phase of the manuscripts, the reviewers, editors and editorial advisors reported 43 problems with the

1  
2  
3  
4  
5  
6  
7  
8  
9 descriptions of the interventions. Most comments focused on the need  
10 for clarification of the sequencing of the technique described  
11 (procedure) and the patient group under study (recipient). Thirty  
12 three percent (14/43) of these problems were not fully fixed by the  
13 time the paper was published (as assessed by our raters) (Figure 2).  
14 Where reviewers and editors identified problems with descriptions of  
15 the setting, the provider, the materials, and the schedule, these were  
16 improved by the time of publication. Problems that were not corrected  
17 largely concerned the descriptions of the procedures of the treatments  
18 i.e. it was not clear what happened and when. Table 2 shows the 14  
19 problems identified at pre-publication which were not sufficiently  
20 remedied in the published version.  
21  
22  
23  
24  
25  
26  
27  
28  
29  
30  
31  
32  
33  
34  
35  
36  
37  
38  
39  
40  
41  
42  
43  
44  
45  
46  
47  
48  
49  
50  
51  
52  
53  
54  
55  
56  
57  
58  
59  
60

## DISCUSSION

The majority of published trials in our study lacked important details describing the treatment. These details would be required for health care professionals to undertake these treatments in practice, or for other researchers to replicate, or build on, the findings in future studies. Many problems were easily rectifiable, such as clearer reporting on the sequencing of techniques, actual doses/durations of treatments and their scheduling. Although the majority of problems were not picked up by peer reviewers and editors, when they were detected only about two-thirds were fixed before publication.

Our findings are consistent with our earlier analysis of 80 RCTs and systematic reviews published in the journal *Evidence Based Medicine* where approximately a half (51%) had an "inadequate" description of the treatment[10]. *Evidence Based Medicine* abstracts journals in a range of specialties and the similarity in results suggests that the results in this study are valid. Unlike, this study, our previous study did not quantitatively document the types of problems with the treatments described but focused on a global assessment of the replicability of the treatment and whether authors could provide the missing details when asked to do so. The current study went further than our earlier study in that it reports the frequency of poor reporting of specific aspects of trial interventions.[10]

Our study has several limitations. Firstly, we included only RCTs from a single year in one general medical journal and the results may not be generalisable to other journals. However, the BMJ has a lengthy review process and is generally considered to publish high quality research so it is likely that the situation is worse for less influential lower impact factor journals with fewer resources. The BMJ strives to publish papers to "help doctors make better decisions" and is very aware of the importance of good scientific reporting of

1  
2  
3  
4  
5  
6  
7  
8  
9 research. As such it may pay more attention to reporting issues than  
10 other journals. We found that the BMJ reported these aspects of  
11 interventions poorly and this suggests that the situation may well be  
12 worse for other journals. Secondly, we evaluated RCTs published in  
13 2006 and it is possible that there have been improvements in  
14 reporting, given the wider use of the internet and web appendices in  
15 recent years. Further research would be needed to test this.  
16 Thirdly, we used only two raters who were both academic general  
17 practitioners to assess the manuscripts some of which could have  
18 described treatments they were not familiar with. However, all RCTs  
19 published in the BMJ describe treatments that should be familiar to  
20 general practitioners, as it targets a general medical readership.  
21 None of the papers in this study described treatments that our raters  
22 found too specialised to evaluate so none were excluded. Our raters  
23 were also experienced academics interested in improving the reporting  
24 quality of trials and as such the results may represent the best case  
25 scenario. Finally, we did not try to separately assess planned versus  
26 actual treatment, which may sometimes differ substantially and require  
27 specific description[21].  
28  
29  
30  
31  
32  
33  
34  
35

36 We identified a few other previous studies which have examined the  
37 adequacy of treatment descriptions (Table 1). Most of the studies  
38 listed in Table 1 are likely to have reported overestimates of  
39 replicability as only one asked whether there was sufficient  
40 information to allow replication[10]. In developing summaries for  
41 systematic reviews of back pain, Glenton and colleagues[6] found  
42 sufficient detail "about what the treatment involved" for patients in  
43 only 3 of 24 (13%) treatments, and used 32 other sources to obtain  
44 details for the other 21 treatments. Similarly a review[7] of 29  
45 guideline implementation studies found that the majority lacked  
46 details of how the intervention was carried out, e.g., only 7 (24%)  
47 supplied details of timing. Three other studies simply checked the  
48  
49  
50  
51  
52  
53  
54  
55  
56  
57  
58  
59  
60

1  
2  
3  
4  
5  
6  
7  
8  
9 fourth CONSORT item[3-5]. Similar problems have been identified in  
10 other areas. In a recent survey[15] of 93 publications with novel  
11 questionnaires in JAMA, NEJM, and BMJ, four printed the questionnaire  
12 in the article, three provided online access, but authors failed to  
13 provide questionnaires for 37 of 81 (46%) studies. For some clinical  
14 domains, improving the descriptions of treatments may require  
15 additional work to standardise and document the procedures prior to  
16 clinical trials[16].  
17  
18  
19

20  
21 Similar to many journals, BMJ authors are requested to complete the  
22 CONSORT statement when submitting a paper describing an RCT, but are  
23 not specifically asked to describe their interventions in detail. BMJ  
24 reviewers are not routinely instructed to comment on the replicability  
25 of treatments described in papers, but are instructed to check the  
26 CONSORT statement provided by the author. However, item 4 in the  
27 CONSORT statement appears insufficient to guide authors and reviewers  
28 in all the elements needed, and CONSORT have, so far, added three  
29 intervention extensions (non-pharmacological, herbal, and acupuncture  
30 - [www.consort-statement.org/extensions/](http://www.consort-statement.org/extensions/)), but these overlap, and a  
31 generic checklist with supplementary lists is needed-.  
32  
33  
34  
35  
36

37 Medical journals often send papers to reviewers who are practicing  
38 clinicians in the area of interest and some may choose to comment on  
39 the reporting details of the treatment. However, the limitations of  
40 peer review are well documented[17-20]. In our study, peer reviewers  
41 infrequently commented on inadequate reporting of trial details.  
42 Insufficient instructions and guidance to reviewers and lack of  
43 training may compound the problem. However, even when some  
44 limitations were identified by reviewers at the pre-publication stage  
45 they were not always remedied in the published version.  
46  
47  
48  
49  
50  
51  
52  
53  
54  
55  
56  
57  
58  
59  
60

1  
2  
3  
4  
5  
6  
7  
8  
9 The incomplete treatment descriptions we found represent a substantial  
10 waste of the research budget, trial participants' time, and an  
11 opportunity cost for clinicians and patients. Though not surprising,  
12 the lower rates of adequate description of non-drug alternatives is  
13 unfortunate given the rapid growth of the pharmaceuticals budget, and  
14 the potential for non-drug therapies for alternative treatments.  
15 Funders, authors, journals, and research users should all be concerned  
16 with this problem and work together to improve the situation[21].  
17 Journals that want to publish high quality research of use to  
18 practicing health care professionals need to pay attention to adequate  
19 descriptions of treatments. One element of any solution should be a  
20 simple checklist, such as the generic one we have developed, or  
21 specific checklists such as the CONSORT interventions extensions  
22 (<http://www.consort-statement.org/extensions/>). Such checklists may  
23 be useful for authors, peer reviewers, and editors to help ensure that  
24 important details of treatments are provided before the paper is  
25 published and in the public domain. However, the effectiveness of  
26 such checklists needs to be further evaluated. Ideally the full  
27 intervention description should be published with the primary article,  
28 but this often is not feasible, e.g, with manual procedures or  
29 extensive training materials. ~~Finally,~~ ~~§~~Since describing such study  
30 materials could add significantly to the length of papers we suggest  
31 that editors encourage the use of webextras and/or links to study  
32 materials on authors' or funders' institutional websites; these should  
33 be checked for availability at the time of publication, since  
34 researchers may retire, move, or for other reasons not respond after  
35 publication.

Formatted: Normal, Don't adjust space between Latin and Asian text, Don't adjust space between Asian text and numbers



**Acknowledgements**

Formatted: Font: Bold

We thank the BMJ Group for SS's time on this project.

**Contributorship**

SS had full access to all the data in the study and takes responsibility for the integrity of the data and the accuracy of the data analysis. No other staff at the BMJ were involved in the design and conduct of the study; collection, management, analysis, and interpretation of the data; and preparation, review, or approval of the manuscript. SS, PG and CH designed the study; PG and CH rated the manuscripts for replicability; SS analysed the manuscripts' backmatter; SS analysed the data; SS, PG and CH wrote the manuscript.

**Funding**

This research received no specific grant from any funding agency in the public, commercial or not-for-profit sectors.

The University Department of Primary Health Care is part of the NIHR School of Primary Care Research which provides financial support for senior staff who contributed to this paper. The opinions are those of the authors and not of the Department of Health.

**Competing interests**

SS is employed full time by BMJ Group.

**Ethics**

We did not seek ethics committee approval for this study as it mainly involved the evaluation of published manuscripts in the public domain. Only SS had access to named reviewers' and editors' comments but is a full time employee of the BMJ Publishing Group and regularly reads such material as part of her job. On submitting to the BMJ, prospective authors are informed that their paper may be enrolled in a

1  
2  
3  
4  
5  
6  
7  
8  
9  
10  
11  
12  
13  
14  
15  
16  
17  
18  
19  
20  
21  
22  
23  
24  
25  
26  
27  
28  
29  
30  
31  
32  
33  
34  
35  
36  
37  
38  
39  
40  
41  
42  
43  
44  
45  
46  
47  
48  
49  
50  
51  
52  
53  
54  
55  
56  
57  
58  
59  
60

research study as part of improving the peer review process and are given the opportunity to opt out of this.

**Data sharing**

The checklist responses for each trial alongside an indication of whether a problem with the description of the intervention was reported prior to publication are available as a dataset on Dryad: doi:10.5061/dryad.c1jv0.

## REFERENCES

1. Moher D, Schulz KF, Altman DG, et al. The CONSORT Statement: Revised Recommendations for Improving the Quality of Reports of Parallel-Group Randomized Trials. *Ann Intern Med* 2001;134:657-62.
2. Plint AC, Moher D, Morrison A, et al. Does the CONSORT checklist improve the quality of reports of randomised controlled trials? A systematic review. *Med J Aust* 2006;185(5):263-7.
3. Thabane L, Chu R, Cuddy K, et al. What is the quality of reporting in weight loss intervention studies? A systematic review of randomized controlled trials. *Int J Obes (Lond)* 2007;31(10):1554-9.
4. Kober T, Trelle S, Engert A. Reporting of randomized controlled trials in Hodgkin lymphoma in biomedical journals. *J Natl Cancer Inst* 2006;98(9):620-5.
5. Lai R, Chu R, Fraumeni M, et al. Quality of randomized controlled trials reporting in the primary treatment of brain tumors. *J Clin Oncol* 2006;24(7):1136-44.
6. Glenton C, Underland V, Kho M, et al. Summaries of findings, descriptions of treatments, and information about adverse effects would make reviews more informative. *J Clin Epidemiol* 2006;59(8):770-8. Epub 2006 May 30.
7. Thorsen T & Makela M (eds). Changing Professional Practice Theory and Practice of Clinical Guidelines Implementation. Danish Institute for Health Services Research and Development, 1999. <http://www.dsi.dk>
8. Lasserson DS, Glasziou PP, Perera R, et al. Initiating insulin regimens to achieve intensive glycaemic control for people with type 2 diabetes mellitus. Society for Academic Primary Care Conference, 2006.
9. Jacquier I, Boutron I, Moher D, et al. The Reporting of Randomized Clinical Trials Using a Surgical Intervention Is in Need of

- 1  
2  
3  
4  
5  
6  
7  
8  
9 Immediate Improvement A Systematic Review. *Ann Surg* 2006;244: 677-  
10 83.  
11  
12 10. Glasziou P, Meats E, Heneghan C, et al. What is missing from  
13 descriptions of treatment in trials and reviews? *BMJ* 2008;336:1472-  
14 4.  
15  
16 11. Davidson KW, Goldstein M, Kaplan RM, et al. Evidence-based  
17 behavioral medicine: what is it and how do we achieve it? *Ann*  
18 *Behav Med* 2003;26(3):161-71.  
19  
20 12. Gagnier JJ, Boon H, Rochon P, et al. Reporting Randomized,  
21 Controlled Trials of Herbal Interventions: An Elaborated CONSORT  
22 Statement. *Ann Intern Med* 2006;144:364-7.  
23  
24 13. Dean ME, Morag K, Coulter MK, et al. Reporting Data on Homeopathic  
25 Treatments (RedHot): A Supplement to CONSORT. *Forsch*  
26 *Komplementarmed* 2006;13:368-71.  
27  
28 14. <http://www.cochrane.org/sites/default/files/uploads/glossary.pdf>.  
29 [Accessed 30 July 2012].  
30  
31 15. Schilling LM, Kozak K, Lundahl K, et al. Inaccessible novel  
32 questionnaires in published medical research: hidden methods,  
33 hidden costs. *Am J Epidemiol* 2006;164(12):1141-4. Epub 2006 Oct 13.  
34  
35 16. Pomeroy VM, Cooke E, Hamilton S, et al. Development of a schedule  
36 of current physiotherapy treatment used to improve movement control  
37 and functional use of the lower limb after stroke: a precursor to a  
38 clinical trial. *Neurorehabil Neural Repair* 2005;19(4):350-9.  
39  
40 17. Godlee F, Jefferson T, editors. *Peer review in health sciences*.  
41 London: *BMJ Books*, 1999.  
42  
43 18. Altman DG. The scandal of poor medical research. *BMJ* 1994;308:283-  
44 4.  
45  
46 19. Jefferson T, Alderson P, Wager E, et al. Effects of peer review: A  
47 systematic review. *JAMA* 2002;287:2784-6.  
48  
49  
50  
51  
52  
53  
54  
55  
56  
57  
58  
59  
60

- 1  
2  
3  
4  
5  
6  
7  
8  
9 20. Schroter S, Black N, Evans S, et al. What errors do peer reviewers  
10 detect, and does training improve their ability to detect them? *J*  
11 *R Soc Med* 2008;*101*:507-14.  
12  
13 21. Glasziou P, Chalmers I, Altman DG, et al. Taking healthcare  
14 interventions from trial to practice. *BMJ* 2010;*341*:c3852.  
15  
16 22. Phelan M, Blenkinsopp A, Foster NE, et al. Pharmacists-led  
17 medication review for knee pain in older adults: Content, process  
18 and outcomes. *International Journal of Pharmacy Practice* 2008;*16*:  
19 347-55.  
20  
21  
22  
23  
24  
25  
26  
27  
28  
29  
30  
31  
32  
33  
34  
35  
36  
37  
38  
39  
40  
41  
42  
43  
44  
45  
46  
47  
48  
49  
50  
51  
52  
53  
54  
55  
56  
57  
58  
59  
60

Table 1: Previous studies of adequacy of descriptions of treatments in trials.

| <i>Clinical Issue</i>                                            | <i>Number of Trials</i> | <i>Number (%) Replicable</i> | <i>Methods of deciding replicability</i>                                                                                                                             |
|------------------------------------------------------------------|-------------------------|------------------------------|----------------------------------------------------------------------------------------------------------------------------------------------------------------------|
| Weight loss interventions[3]                                     | 63                      | 62 (98%)                     | Compliance with item 4 of CONSORT statement*                                                                                                                         |
| Treatments of brain tumours[4]                                   | 74                      | 68 (92%)                     | Compliance with item 4 of CONSORT statement*                                                                                                                         |
| Treatments of Hodgkin's lymphoma[5]                              | 241                     | 231 (96%)                    | Compliance with item 4 of CONSORT statement*                                                                                                                         |
| Back pain[6]                                                     | 24                      | 3 (13%)                      | Sufficient information on what happens before, during, and after treatment                                                                                           |
| Implementation of Guidelines[7]                                  | 29                      | < 7 (16%)                    | Assessed 6 elements: flexibility, timing, content, medium, deliverer, receiver. There is not an overall adequacy rating, but none was 100% and only 7/29 gave timing |
| Insulin initiation in Type 2 diabetes[8]                         | 14                      | 3 (21%)                      | Providing both starting dose and titration regime.                                                                                                                   |
| Surgical Procedures intended[9]                                  | 158                     | 138 (87%)                    | Only required that "some" detail was provided, not sufficient for replication; 41% also provided some detail on actual surgery administered.                         |
| Range of topics published in Evidence Based Medicine Journal[10] | 55                      | 36 (65%)                     | Two general practitioners were independently asked whether they could use this treatment with a patient if they saw them tomorrow                                    |

\* Item 4 is: "Precise details of the treatments intended for each group and how and when they were actually administered"

1  
2  
3  
4  
5 **Figure 1: Elements of interventions - percentage clearly described.**  
6  
7

8  
9 Note: Each element is fully described in Box 1.  
10  
11  
12  
13  
14  
15  
16  
17  
18  
19  
20  
21  
22  
23  
24  
25  
26  
27  
28  
29  
30  
31  
32  
33  
34  
35  
36  
37  
38  
39  
40  
41  
42  
43  
44  
45  
46  
47  
48  
49

1  
2  
3  
4  
5 **Figure 2: Papers where editors' or reviewers' identified a problem (pre-publication), and**  
6 **whether it remained at post-publication.**  
7

8  
9  
10  
11 Note: Each element is fully described in Box 1.  
12  
13  
14  
15  
16  
17  
18  
19  
20  
21  
22  
23  
24  
25  
26  
27  
28  
29  
30  
31  
32  
33  
34  
35  
36  
37  
38  
39  
40  
41  
42  
43  
44  
45  
46  
47  
48  
49



Table 2: Examples of problems identified at pre-publication and not fixed by time of publication.

| Paper title                                                                                                                                                       | Type of problem identified at pre- and post-publication | Nature of the problem                                                                                             |
|-------------------------------------------------------------------------------------------------------------------------------------------------------------------|---------------------------------------------------------|-------------------------------------------------------------------------------------------------------------------|
| Partner notification of chlamydia infection in primary care: randomised controlled trial and analysis of resource use                                             | Procedure                                               | Not clear exactly what was done and when                                                                          |
| Didgeridoo playing as alternative treatment for obstructive sleep apnoea syndrome: randomised controlled trial                                                    | Intensity                                               | Description of didgeridoo practice times not clear                                                                |
| Treatment of low back pain by acupuncture and physical therapy: randomised controlled trial                                                                       | Procedure                                               | Can't tell how personalised the treatment was - who had what done and when                                        |
| Effect of enhanced psychosocial care on antipsychotic use in nursing home residents with severe dementia: cluster randomised trial                                | Procedure                                               | Complex intervention and what was received and when for both groups is unclear.                                   |
| Effect of patient completed agenda forms and doctors' education about the agenda on the outcome of consultations: randomised controlled trial                     | Recipient                                               | Recipient of intervention unclear                                                                                 |
| Effect of telephone contact on further suicide attempts in patients discharged from an emergency department: randomised controlled study                          | Procedure                                               | More detail needed on the content and duration of the phone calls ie effort involved to enhance compliance        |
| Effective control of dengue vectors with curtains and water container covers treated with insecticide in Mexico and Venezuela: cluster randomised trials          | Procedure                                               | Not clear why all the houses did not get nets and what they actually received                                     |
| Randomised controlled trial of four commercial weight loss programmes in the UK: initial findings from the BBC "diet trials"                                      | Procedure                                               | Not enough detail of the content of the programmes or time involved                                               |
| A randomised controlled trial of management strategies for acute infective conjunctivitis in general practice                                                     | Recipient                                               | Recipients poorly described re conjunctivitis inclusion/exclusion criteria                                        |
| Effectiveness of telephone counselling by a pharmacist in reducing mortality in patients receiving polypharmacy: randomised controlled trial                      | Procedure                                               | Not clear exactly what the pharmacists said or did. It must have been more than just a reminder phonecall.        |
| Telephone administered cognitive behaviour therapy for treatment of obsessive compulsive disorder: randomised controlled non-inferiority trial                    | Procedure                                               | The actual therapy provided is only very briefly described                                                        |
| Mobilisation with movement and exercise, corticosteroid injection, or wait and see for tennis elbow: randomised trial                                             | Procedure                                               | Not clear what the physiotherapy actually involved                                                                |
| Effectiveness of community physiotherapy and enhanced pharmacy review for knee pain in people aged over 55 presenting to primary care: pragmatic randomised trial | Procedure                                               | Not clear what happened and when. Content of pharmacist sessions unclear.<br>NB: Not fully described due to space |

1  
2  
3  
4  
5  
6  
7  
8  
9  
10  
11  
12  
13  
14  
15  
16  
17  
18  
19  
20  
21  
22  
23  
24  
25  
26  
27  
28  
29  
30  
31  
32  
33  
34  
35  
36  
37  
38  
39  
40  
41  
42  
43  
44  
45  
46  
47  
48  
49

For peer review only

|                                                                                                                                                     |           |                                                                                                                |
|-----------------------------------------------------------------------------------------------------------------------------------------------------|-----------|----------------------------------------------------------------------------------------------------------------|
|                                                                                                                                                     |           | limitations. More complete description of the pharmacy intervention subsequently published [22]                |
| Prevention of HIV and sexually transmitted diseases in high risk social networks of young Roma (Gypsy) men in Bulgaria: randomised controlled trial | Procedure | Intervention components versus what controls received not clear - need to know the details of the intervention |

1  
2  
3  
4  
5  
6  
7  
8  
9  
10  
11  
12  
13  
14  
15  
16  
17  
18  
19  
20  
21  
22  
23  
24  
25  
26  
27  
28  
29  
30  
31  
32  
33  
34  
35  
36  
37  
38  
39  
40  
41  
42  
43  
44  
45  
46  
47  
48  
49  
50  
51  
52  
53  
54  
55  
56  
57  
58  
59  
60

**Box 1: Interventions checklist**

|           |                                                                                                                                  |                                                          |
|-----------|----------------------------------------------------------------------------------------------------------------------------------|----------------------------------------------------------|
| Setting   | Is it clear <b>where</b> the intervention was delivered?                                                                         | <input type="checkbox"/> Yes <input type="checkbox"/> No |
| Recipient | Is it clear <b>who is receiving</b> the intervention?                                                                            | <input type="checkbox"/> Yes <input type="checkbox"/> No |
| Provider  | Is it clear <b>who delivered</b> the intervention?                                                                               | <input type="checkbox"/> Yes <input type="checkbox"/> No |
| Procedure | Is the <b>procedure</b> (including the sequencing of the technique) of the intervention sufficiently clear to allow replication? | <input type="checkbox"/> Yes <input type="checkbox"/> No |
| Materials | Are the <b>physical or informational materials</b> used adequately described?                                                    | <input type="checkbox"/> Yes <input type="checkbox"/> No |
| Intensity | Is the <b>dose/duration of individual sessions</b> of the intervention clear?                                                    | <input type="checkbox"/> Yes <input type="checkbox"/> No |
| Schedule  | Is the <b>schedule (interval, frequency, duration, or timing)</b> of the intervention clear?                                     | <input type="checkbox"/> Yes <input type="checkbox"/> No |
| Missing   | Is there anything else <b>missing</b> from the description of the intervention?<br>If yes, what? _____                           | <input type="checkbox"/> Yes <input type="checkbox"/> No |
